# Supplementary material for: Multifactorial processes underlie parallel opsin loss in neotropical bats
Source: eLife journal article supplement (doi:10.7554/elife.37412), 2018-12-17

Field specimens: L opsin, S opsin, Merged

*Molossus molossus*

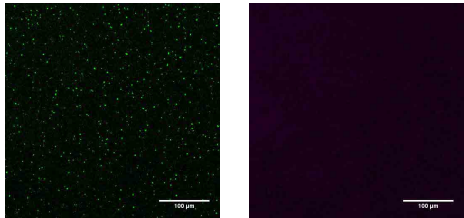

*Eptesicus fuscus*

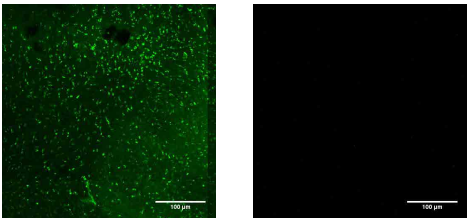

*Pteronotus quadridens*

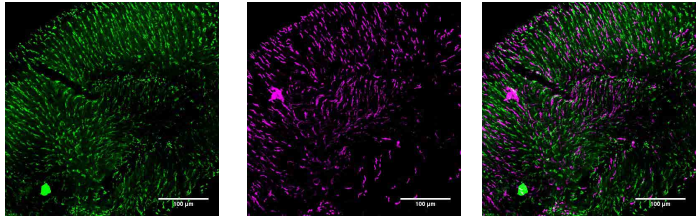

*Pteronotus davyi*

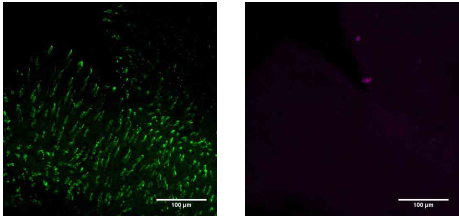

*Pteronotus parnellii*

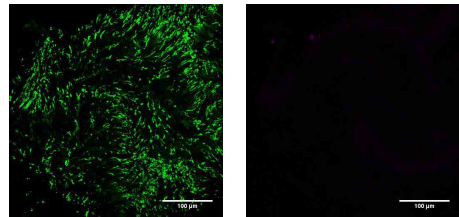

*Mormoops blainvillei*

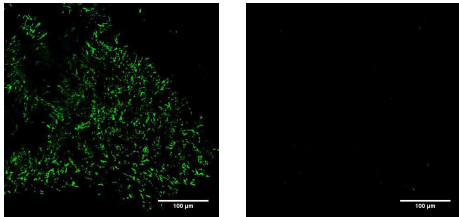

*Macrotus waterhousii*

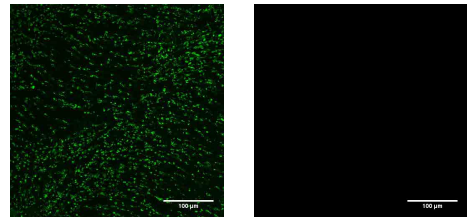

*Desmodus rotundus*

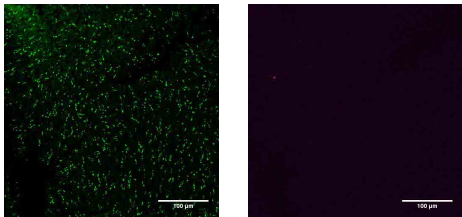

*Chrotopterus auritus*

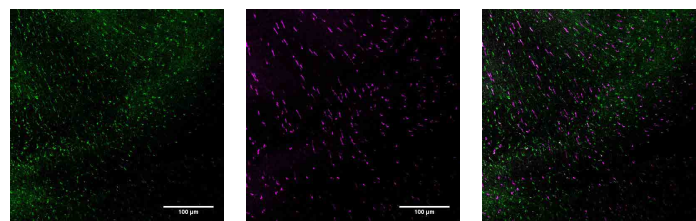

*Trachops cirrhosus*

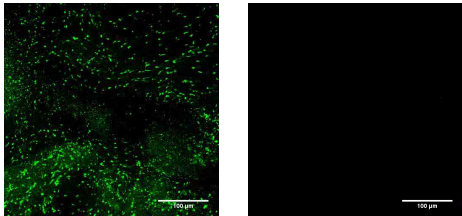

*Phyllostomus discolor*

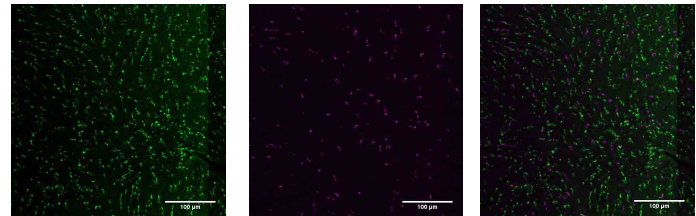

*Gardnerycteris crenulatum*

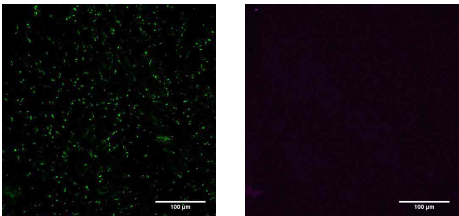

*Monophyllus redmani*

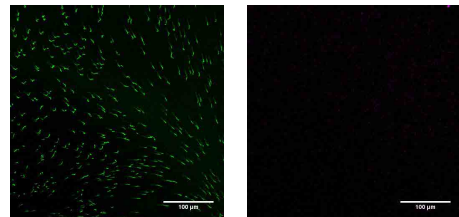

*Glossophaga soricina*

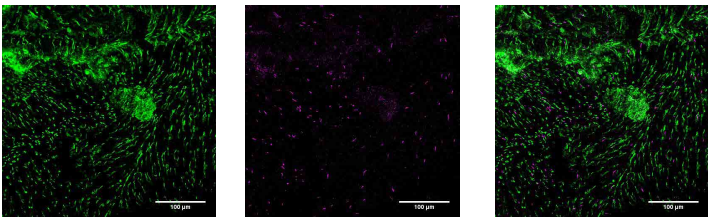



## Field specimens 2: L opsin, S opsin, Merged

*Brachyphilla nana*

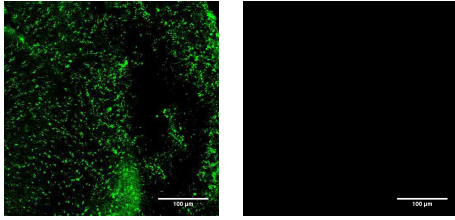

*Erophylla sezekorni*

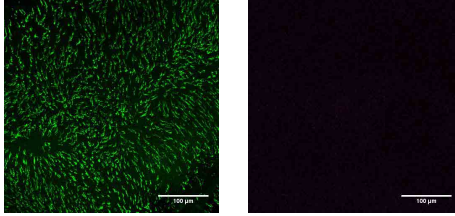

*Carollia sowelli*

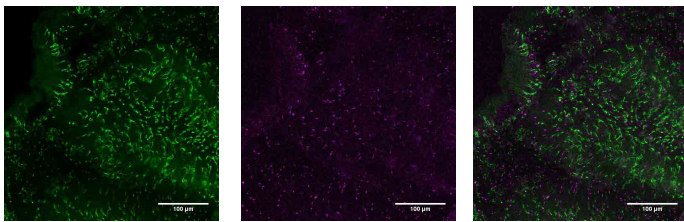

*Sturnira lilium*

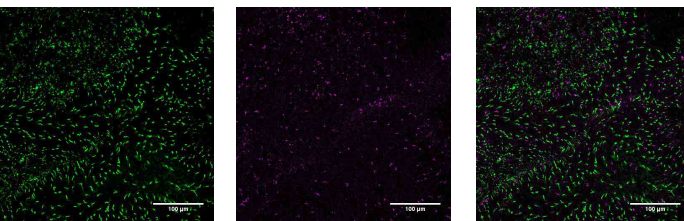

*Phyllops falcatus*

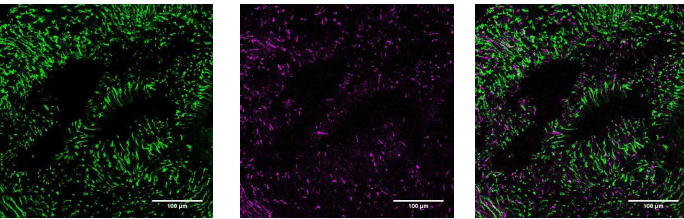

*Artibeus lituratus*

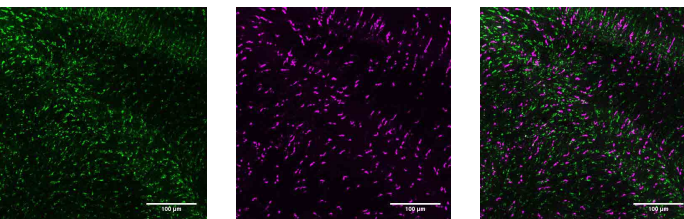

*Phyllonycteris poeyi*

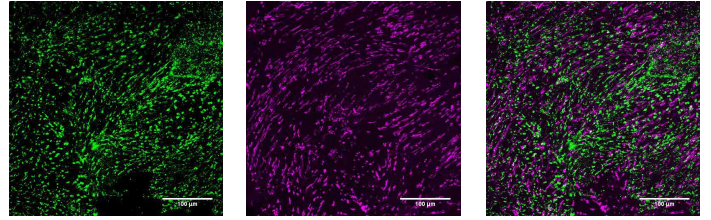

*Erophylla bombifrons*

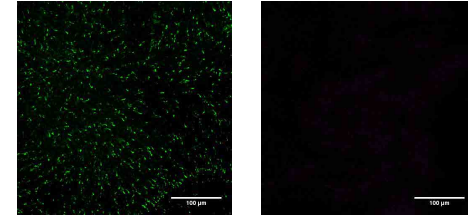

*Carollia perspicillata*

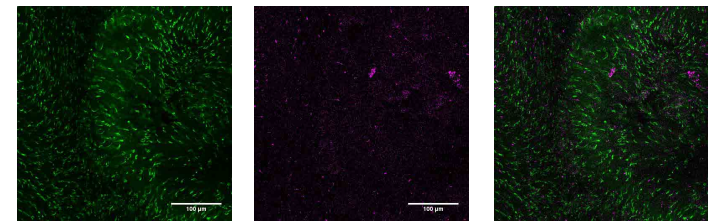

*Uroderma bilobatum*

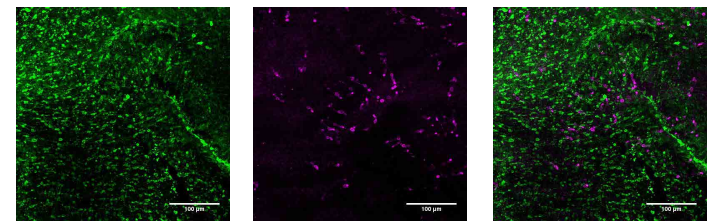

*Artibeus jamaicensis*

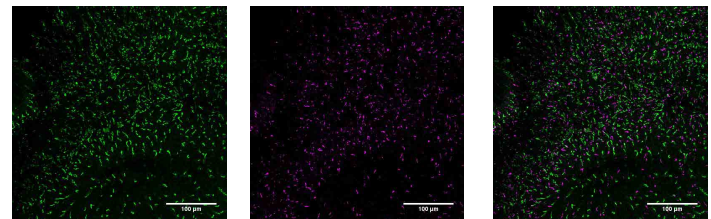

*Artibeus phaeotis*

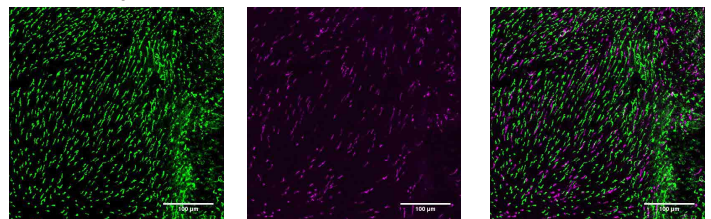



Museum specimens: L opsin, S opsin, Merged

*Tadarida brasiliensis*

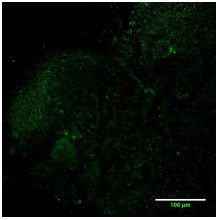

n.d.

*Chilonatalus micropus*

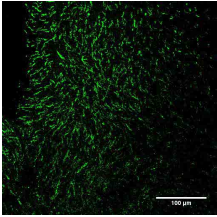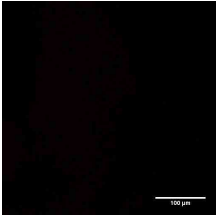

*Saccopteryx bilineata*

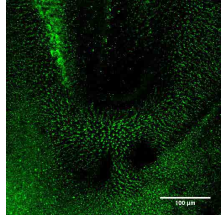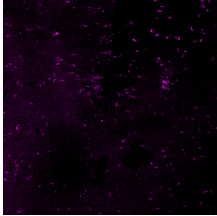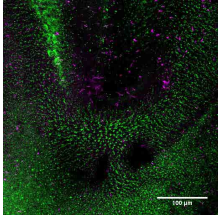

*Saccopteryx leptura*

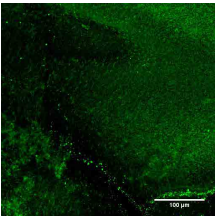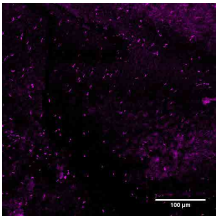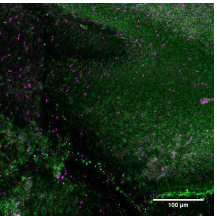

*Noctilio leporinus*

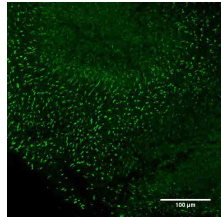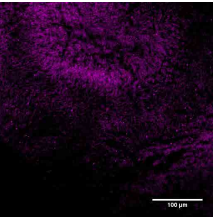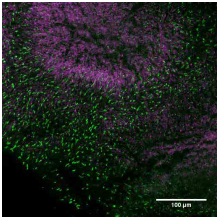

*Diaemus youngi*

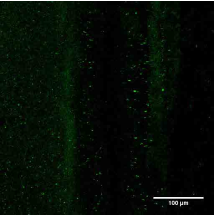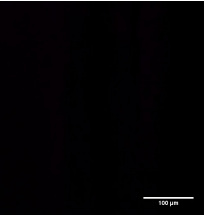

*Tonotia saurophila*

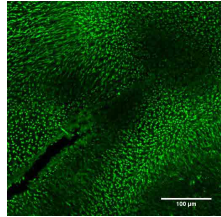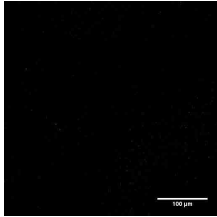

*Phyllostomus hastatus*

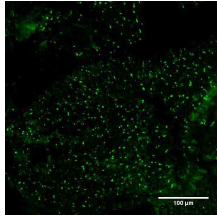

n.d.

*Phyllostomus elongatus*

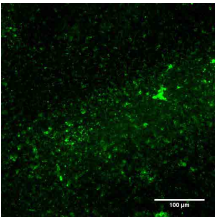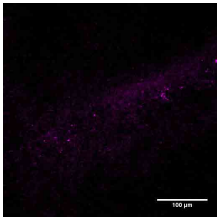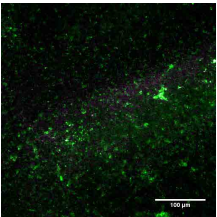

*Anoura geoffroyi*

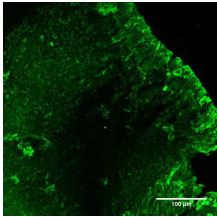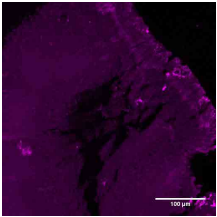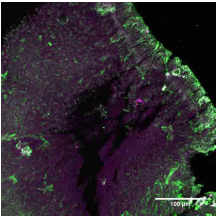

*Lonchophylla robusta*

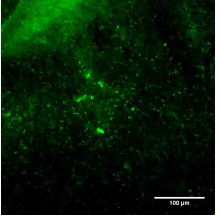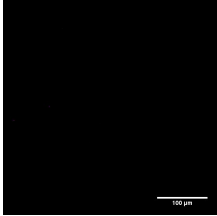

*Carollia brevicauda*

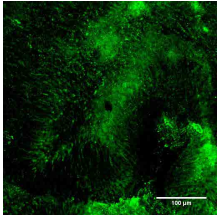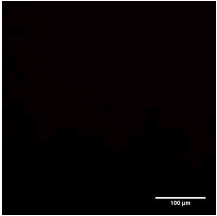

*Rhinophylla fischerae*

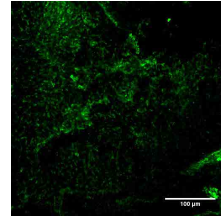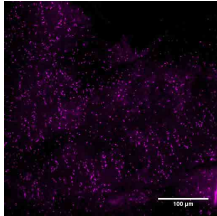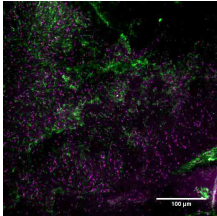

*Rhinophylla pumilio*

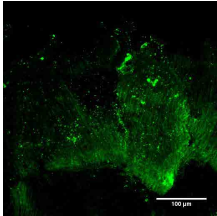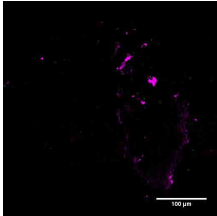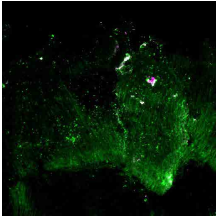



## Museum specimens 2: L opsin, S opsin, Merged

*Stunira ludovici*

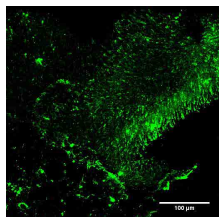

n.d.

*Stunira tildae*

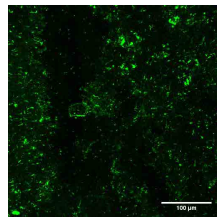

n.d.

*Vampyroides caraccioli*

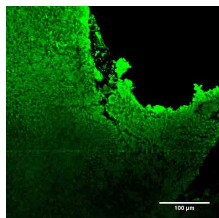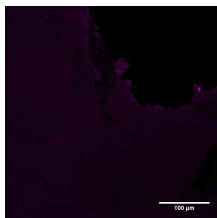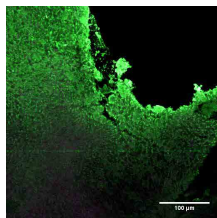

*Platyrrhinus aurarius*

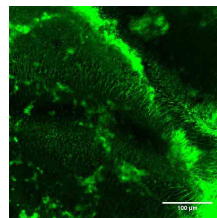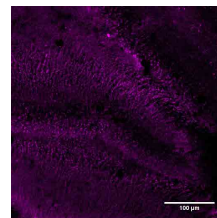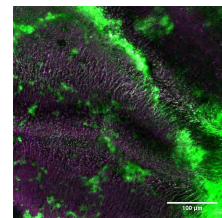

*Platyrrhinus dorsalis*

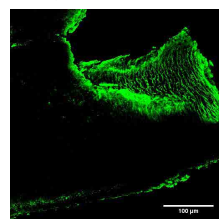

n.d.

*Platyrrhinus hellerii*

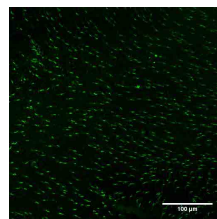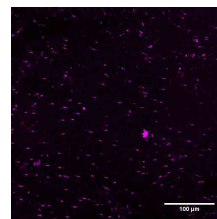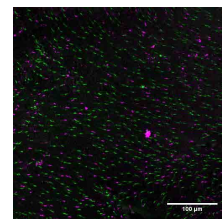

*Mesophylla macconnelli*

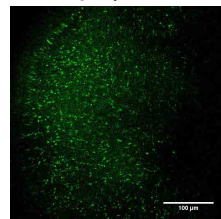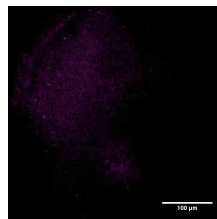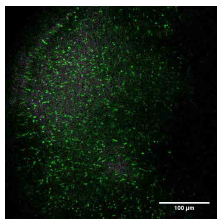

*Vampyriscus bidens*

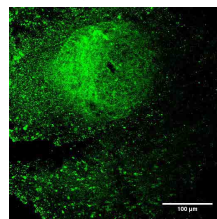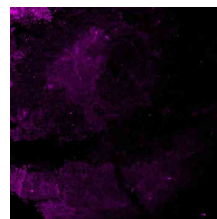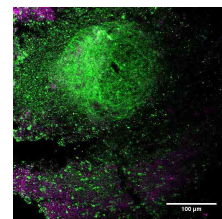

*Enchisthenes hartii*

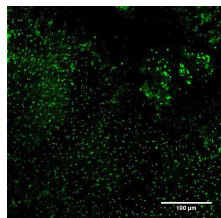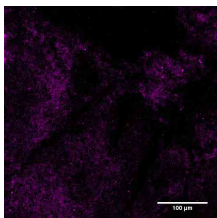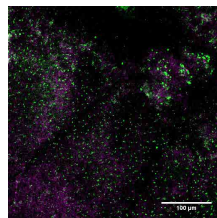

*Sphaeronycteris toxophyllum*

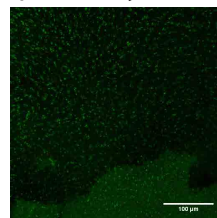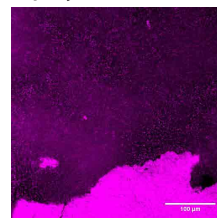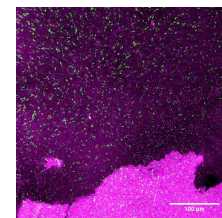

*Centurio senex*

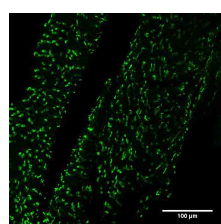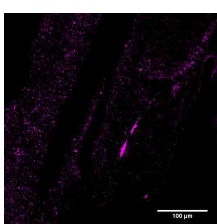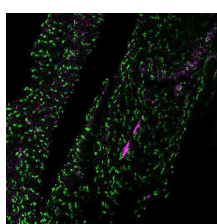

*Artibeus cinereus*

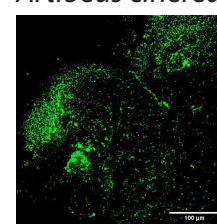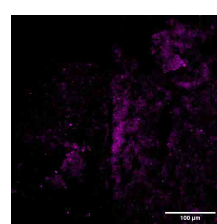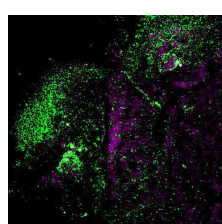

*Artibeus concolor*

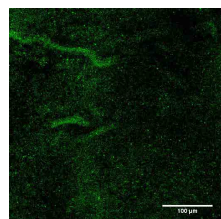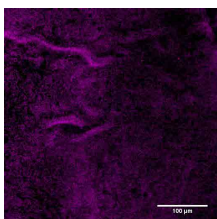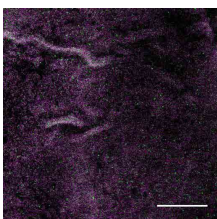

*Artibeus fraterculus*

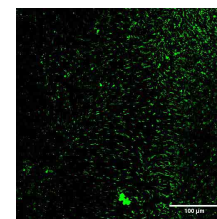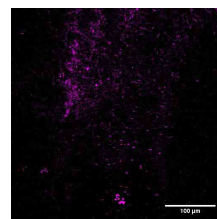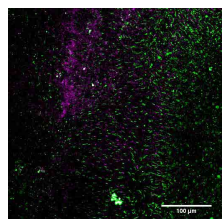

*Artibeus planirostris*

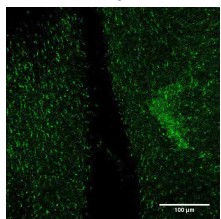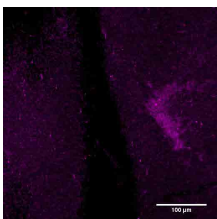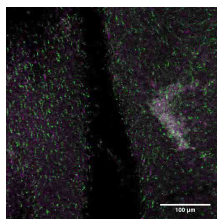

Supplement: supp [file elife_poa_e37412_Figure_1_figure_supplement_1.pdf › elife_poa_e37412_Figure_1_figure_supplement_1.pdf]
