# Supplementary material for: Multifactorial processes underlie parallel opsin loss in neotropical bats
Source: eLife journal article supplement (doi:10.7554/elife.37412), 2018-12-17
Supplement: supp [file elife_poa_e37412_Figure_1_figure_supplement_2.pdf › elife_poa_e37412_Figure_1_figure_supplement_2.pdf]

|                         |           |                                                                                     |                              |
|-------------------------|-----------|-------------------------------------------------------------------------------------|------------------------------|
| <i>M. molossus</i>      | ISKMSGEE  |    | FIAPVWAFHLQAAFMGFVFFAGTPLNAT |
| <i>T. brasiliensis</i>  | .....     |    | .....                        |
| <i>E. fuscus*</i>       | M.....    |    | .....                        |
| <i>M. nigricans</i>     | XXXXX..   |    | .....                        |
| <i>S. bilineata</i>     | XXXXTE..  |    | .....                        |
| <i>S. leptura</i>       | SHGPTE..  |    | .....                        |
| <i>N. leporinus*</i>    | XXX....D  |    | .....A                       |
| <i>M. blainvillei*</i>  | V.....    |    | .....VC..T.....I..RN.TQCH    |
| <i>P. quadridens</i>    | V.....    |    | .....                        |
| <i>P. p. pusillus</i>   | V....R..  |    | .....                        |
| <i>M. waterhousii</i>   | V.....-   |    | .....CPSASRQPSRALSSLQ.H.SVPW |
| <i>D. rotundus*</i>     | V.E.....  |    | .....M.SMPW                  |
| <i>T. cirrhosis</i>     | XXXXXXX.  |    | .....                        |
| <i>T. saurophila</i>    | V.E.....  |    | .....                        |
| <i>P. hastatus</i>      | XXE.....  |    | .....                        |
| <i>P. elongatus</i>     | XXX.....  |    | .....                        |
| <i>P. discolor*</i>     | V.E.....  |    | .....                        |
| <i>G. crenulatum</i>    | XX.....   |    | .....                        |
| <i>A. geoffroyi</i>     | XXXXXXXXX |    | .....A                       |
| <i>G. soricina</i>      | XXXXX..   |    | .....M                       |
| <i>L. spurrelli*</i>    | X.E.....  |    | .....A                       |
| <i>C. brevicauda</i>    | XXXXX..   |    | .....G.....R                 |
| <i>C. perspicillata</i> | V.E.....  |    | .....G.....R                 |
| <i>R. fischeriae</i>    | V.E.....  |    | .....                        |
| <i>R. pumilio</i>       | V.E.....  |   | .....                        |
| <i>S. tildae</i>        | XXXX....  |  | .....                        |
| <i>U. bilobatum</i>     | XTHGPT..  |  | .....V                       |
| <i>V. caraccioli</i>    | V.E.....  |  | .....V                       |
| <i>M. macconnelli</i>   | XXX.....  |  | .....V                       |
| <i>C. villosum</i>      | XXE.....  |  | .....V                       |
| <i>P. falcatus</i>      | E.E.....  |  | .....R.....V                 |
| <i>A. bogotensis</i>    | XXXX....  |  | .....V                       |
| <i>A. fraterculus</i>   | XXXXX..   |  | V.....V                      |
| <i>A. jamaicensis</i>   | V.E.....  |  | .....V                       |
| <i>A. planirostris</i>  | V.E.....  |  | .....V                       |
| <i>H. sapiens*</i>      | MR...-..  |  | .....Y.....T..LI.F...M       |

\*denotes sequences from genomes
