# Supplementary material for: Multifactorial processes underlie parallel opsin loss in neotropical bats
Source: eLife journal article supplement (doi:10.7554/elife.37412), 2018-12-17
Supplement: supp [file elife_poa_e37412_Figure_1_figure_supplement_3.pdf › elife_poa_e37412_Figure_1_figure_supplement_3.pdf]

|                         |   |   |   |   |   |   |   |   |   |   |   |   |   |   |   |   |   |   |   |   |   |   |   |   |   |   |   |   |   |   |   |   |   |   |   |   |   |   |   |   |
|-------------------------|---|---|---|---|---|---|---|---|---|---|---|---|---|---|---|---|---|---|---|---|---|---|---|---|---|---|---|---|---|---|---|---|---|---|---|---|---|---|---|---|
| <i>M. molossus</i>      | M | N | R | Q | F | R | N | C | I | L | Q | L | F | G | K | K | V | D | D | S | S | E | L | S | S | T | S | K | T | E | A | S | S | V | S | S | P | A | * |   |
| <i>T. brasiliensis</i>  | . | . | . | . | . | . | . | . | . | . | . | . | . | . | . | . | . | . | . | . | . | . | . | . | . | . | . | . | . | . | . | . | . | . | . | . | . | . | . | * |
| <i>E. fuscus</i> *      | . | . | . | . | . | . | . | . | . | M | . | . | . | . | . | . | . | . | . | . | . | . | . | . | . | . | . | . | . | . | . | . | . | . | . | . | . | . | * |   |
| <i>M. nigricans</i>     | . | . | . | . | . | . | . | . | . | . | . | . | . | . | . | . | . | . | . | . | . | . | . | . | . | . | . | R | . | . | . | . | . | . | . | . | . | * |   |   |
| <i>C. micropus</i>      | . | . | . | . | . | . | . | . | . | . | L | . | . | . | . | . | . | . | . | . | . | . | . | . | . | . | . | . | . | M | . | . | . | . | . | . | . | * |   |   |
| <i>S. bilineata</i>     | . | . | . | . | . | . | . | . | . | . | . | . | . | . | . | . | . | G | . | F | . | . | . | . | . | . | . | . | . | V | . | . | . | . | . | . | * |   |   |   |
| <i>S. leptura</i>       | . | . | . | . | . | . | . | . | . | . | . | . | . | . | . | . | . | G | . | F | . | . | . | . | . | . | . | . | . | V | . | . | . | . | . | . | * |   |   |   |
| <i>N. leporinus</i> *   | . | . | . | . | . | . | . | . | . | . | K | . | . | . | . | . | . | . | . | . | . | . | . | . | . | . | . | . | . | . | . | . | . | . | . | . | . | * |   |   |
| <i>M. blainvillei</i> * | . | . | . | . | . | . | . | . | . | . | . | . | . | . | . | . | E | . | . | . | . | . | . | . | . | . | . | . | . | V | . | . | . | . | . | . | * |   |   |   |
| <i>P. quadridens</i>    | . | . | . | . | . | . | . | . | . | . | . | . | . | . | . | . | . | . | . | . | . | . | . | . | . | . | . | . | . | . | . | . | . | . | . | . | * |   |   |   |
| <i>P. p. pusillus</i>   | . | . | . | . | . | . | . | . | . | . | . | . | . | . | . | . | . | . | . | . | . | . | . | . | . | . | . | . | . | . | . | . | . | . | . | . | * |   |   |   |
| <i>M. waterhousii</i> * | . | . | . | . | . | . | . | . | . | . | . | . | . | . | . | . | . | . | . | . | . | . | . | . | . | . | . | . | . | . | . | . | . | . | . | . | * |   |   |   |
| <i>D. rotundus</i> *    | . | . | . | . | . | . | . | . | . | . | . | . | . | . | . | . | . | . | . | . | . | . | . | . | . | . | . | . | . | . | . | . | . | . | . | . | * |   |   |   |
| <i>T. cirrhosis</i>     | . | . | . | . | . | . | . | . | . | . | . | . | . | . | . | . | E | . | . | . | . | . | . | . | . | . | . | . | . | . | V | . | . | . | . | . | * |   |   |   |
| <i>T. saurophila</i>    | . | . | . | . | . | . | . | . | . | . | . | . | . | . | . | . | . | . | . | . | . | . | . | . | . | . | . | . | . | . | . | V | . | . | . | . | * |   |   |   |
| <i>P. elongatus</i>     | . | . | . | . | . | . | . | . | . | . | . | . | . | . | . | . | . | . | . | . | . | . | . | . | . | . | . | . | . | . | . | V | . | . | . | . | * |   |   |   |
| <i>P. hastatus</i>      | . | . | . | . | . | . | . | . | . | . | . | . | . | . | . | . | . | . | . | . | . | . | . | . | . | . | . | . | . | . | . | V | . | . | . | . | * |   |   |   |
| <i>P. discolor</i> *    | . | . | . | . | . | . | . | . | . | . | . | . | . | . | . | . | . | . | . | . | . | . | . | . | . | . | . | . | . | . | . | V | . | . | . | . | * |   |   |   |
| <i>G. crenulatum</i>    | . | . | . | . | . | . | . | . | . | . | . | . | . | . | . | . | . | . | . | . | . | . | . | . | . | . | . | . | . | . | . | V | . | . | . | . | * |   |   |   |
| <i>A. geoffroyi</i>     | . | . | . | . | . | . | . | . | . | . | . | . | . | . | . | . | . | . | . | . | . | . | . | . | . | . | . | . | . | . | . | V | . | . | . | . | * |   |   |   |
| <i>G. soricina</i>      | . | . | . | . | . | . | . | . | . | . | . | . | . | . | . | . | . | . | . | . | . | . | . | . | . | . | . | . | . | . | . | V | . | . | . | . | * |   |   |   |
| <i>P. poeyi</i>         | . | . | . | . | . | . | . | . | . | . | . | . | . | . | . | . | . | . | . | . | . | . | . | . | . | . | . | . | . | . | . | V | . | A | . | . | * |   |   |   |
| <i>E. bombifrons</i>    | . | . | . | . | . | . | . | . | . | . | . | . | . | . | . | . | . | . | . | . | . | . | . | . | . | . | . | . | . | . | . | V | . | A | . | . | * |   |   |   |
| <i>B. n. pumila</i>     | . | . | . | . | . | . | . | . | . | . | . | . | . | . | . | . | . | . | . | . | . | . | . | . | . | . | . | . | . | . | . | V | . | . | . | . | * |   |   |   |
| <i>M. redmani</i>       | . | . | . | . | . | . | . | . | . | . | . | . | . | . | . | . | . | . | . | . | . | . | . | . | . | . | . | . | . | . | . | V | . | . | . | . | * |   |   |   |
| <i>L. spurrelli</i> *   | . | . | . | . | . | . | . | . | . | . | . | . | . | . | . | . | . | . | . | . | . | . | . | . | . | . | . | . | . | . | . | V | . | . | . | . | * |   |   |   |
| <i>S. tildae</i>        | . | . | . | . | . | . | . | . | . | . | . | . | . | . | . | . | . | . | . | . | . | . | . | . | . | . | . | . | . | . | . | V | . | . | . | . | * |   |   |   |
| <i>S. ludovici</i>      | . | . | . | . | . | . | . | . | . | . | . | . | . | . | . | . | . | . | . | . | . | . | . | . | . | . | . | . | . | . | . | V | . | . | . | . | * |   |   |   |
| <i>C. brevicauda</i>    | . | . | . | . | . | . | . | . | . | . | . | . | . | . | . | . | . | . | . | . | . | . | . | . | . | . | . | . | . | . | . | V | . | . | . | . | * |   |   |   |
| <i>C. perspicillata</i> | . | . | . | . | . | . | . | . | . | . | . | . | . | . | . | . | . | . | . | . | . | . | . | . | . | . | . | . | . | . | . | V | . | . | . | . | * |   |   |   |
| <i>R. pumilio</i>       | . | . | . | . | . | . | . | . | . | . | . | . | . | . | . | . | . | . | . | . | . | . | . | . | . | . | . | . | . | . | . | V | . | . | . | . | * |   |   |   |
| <i>R. fischerae</i>     | . | . | . | . | . | . | . | . | . | . | . | . | . | . | . | . | . | . | . | . | . | . | . | . | . | . | . | . | . | . | . | V | . | . | . | . | * |   |   |   |
| <i>U. bilobatum</i>     | . | . | . | . | . | . | . | . | . | . | . | . | . | . | . | . | . | . | . | D | . | . | . | . | . | . | . | . | . | . | V | . | . | . | . | * |   |   |   |   |
| <i>V. caraccioli</i>    | . | . | . | . | . | . | . | . | . | . | . | . | . | . | . | . | . | . | . | . | . | . | . | . | . | . | . | . | . | . | . | V | . | . | . | . | * |   |   |   |
| <i>M. macconnelli</i>   | . | . | . | . | . | . | . | . | . | . | . | . | . | . | . | . | . | . | . | . | . | . | . | . | . | . | . | . | . | . | . | V | . | . | . | . | * |   |   |   |
| <i>C. villosum</i>      | . | . | . | . | . | . | . | . | . | . | . | . | . | . | . | . | . | . | . | . | . | . | . | . | . | . | . | . | . | . | . | V | . | . | . | . | * |   |   |   |
| <i>P. falcatus</i>      | . | . | . | . | . | . | . | . | . | . | . | R | . | . | . | . | . | . | . | D | . | . | . | . | . | . | . | . | . | . | V | . | . | . | . | * |   |   |   |   |
| <i>A. bogotensis</i>    | . | . | . | . | . | . | . | . | . | . | . | . | . | . | . | . | . | . | . | . | . | . | . | . | . | . | . | . | . | . | . | V | . | . | . | . | * |   |   |   |
| <i>A. jamaicensis</i> * | . | . | . | . | . | . | . | . | . | . | . | . | . | . | . | . | . | . | . | . | . | . | . | . | . | . | . | . | . | . | . | V | . | . | . | . | * |   |   |   |
| <i>A. fraterculus</i>   | . | . | . | . | . | . | . | . | . | . | . | . | . | . | . | . | . | . | . | . | . | . | . | . | . | . | . | . | . | . | . | V | . | . | . | . | * |   |   |   |
| <i>A. planirostris</i>  | . | . | . | . | . | . | . | . | . | . | . | . | . | . | . | . | . | . | . | . | . | . | . | . | . | . | . | . | . | . | . | V | . | . | . | . | * |   |   |   |
| <i>H. sapiens</i> *     | . | . | . | . | . | . | . | . | . | . | . | . | . | . | . | . | G | . | . | . | . | . | . | . | . | . | . | . | . | . | A | . | V | . | . | * |   |   |   |   |

\*denotes sequences from genomes
