# Supplementary material for: Multifactorial processes underlie parallel opsin loss in neotropical bats
Source: eLife. 2018 Dec 18;7:e37412. doi: 10.7554/eLife.37412 (PMC6333445; doi:10.7554/eLife.37412)
Supplement: Supplementary file 1. — Unknown collection month indicated by ‘unk’, and (?) indicates uncertainty in the museum specimen collection date. [file elife-37412-supp1.xlsx]

## Sheet: RNAseq data
Family	Species names	Specimen number	Country of origin	State	County	Precise location	Sex	Permit
Emballonuridae	Saccopteryx bilineata	PE143	Peru	Loreto	Requena	Jenaro Herrera	Female	Exp. 0002287
Emballonuridae	Saccopteryx leptura	PE157	Peru	Loreto	Requena	Jenaro Herrera	Male	Exp. 0002287
Molossidae	Molossus molossus	PE078	Peru	Loreto	Requena	Jenaro Herrera	Male	Exp. 0002287
Molossidae	Tadarida brasiliensis	DR027	Dominican Republic	Cibao Central	La Vega	El Arroyazo (Ebano Verde)	Male	Exp. 0673
Vespertilionidae	Myotis nigricans	PE082	Peru	Loreto	Requena	Jenaro Herrera	Male	Exp. 0002287
Natalidae	Chilonatalus micropus	DR125	Dominican Republic	Monte Plata	Bayaguana	Cueva La Chepa	Male	Exp. 0673
Noctilionidae	Noctilio leporinus	DR101	Dominican Republic	Sanchez Ramirez	Platanal, Matias	Cueva Honda de Julian	Female	Exp. 0673
Mormoopidae	Pteronotus quadridens	DR041	Dominican Republic	Pedernales	Oviedo	Parque Nacional Jaragua	Female	Exp. 0673
Mormoopidae	Pteronotus parnellii (pusillus)	DR038	Dominican Republic	Pedernales	Oviedo	Parque Nacional Jaragua	Male	Exp. 0673
Mormoopidae	Pteronotus parnellii (pusillus)	DR090	Dominican Republic	Sanchez Ramirez	Platanal, Matias	Cueva Honda de Julian	Male	Exp. 0673
Mormoopidae	Pteronotus parnellii (pusillus)	DR073	Dominican Republic	Pedernales	Oviedo	Parque Nacional Jaragua	Male	Exp. 0673
Mormoopidae	Pteronotus parnellii (pusillus)	DR089	Dominican Republic	Sanchez Ramirez	Platanal, Matias	Cueva Honda de Julian	Male	Exp. 0673
Mormoopidae	Mormoops blainvillei	DR091	Dominican Republic	Sanchez Ramirez	Platanal, Matias	Cueva Honda de Julian	Male	Exp. 0673
Phyllostomidae	Macrotus waterhousii	DR040	Dominican Republic	Pedernales	Oviedo	Parque Nacional Jaragua	Female	Exp. 0673
Phyllostomidae	Desmodus rotundus	PE021	Peru	Piura	Faique	San Antonio	Female	Exp. 0002287
Phyllostomidae	Trachops cirrhosus	LS050	Costa Rica	Heredia Province	Puerto Viejo de Sarapiqui	La Selva Biological Station	Male	R-041-2017-OT-CONAGEBIO
Phyllostomidae	Tonatia saurophila	PE084	Peru	Loreto	Requena	Jenaro Herrera	Male	Exp. 0002287
Phyllostomidae	Phyllostomus hastatus	PE091	Peru	Loreto	Requena	Jenaro Herrera	Male	Exp. 0002287
Phyllostomidae	Phyllostomus elongatus	PE109	Peru	Loreto	Requena	Jenaro Herrera	Female	Exp. 0002287
Phyllostomidae	Gardnerycteris crenulatum	PE095	Peru	Loreto	Requena	Jenaro Herrera	Male	Exp. 0002287
Phyllostomidae	Anoura geoffroyi	PE023	Peru	Piura	Faique	San Antonio	Female	Exp. 0002287
Phyllostomidae	Monophyllus redmani	DR013	Dominican Republic	Monte Plata	Autopista Samaná Km 51	Parque de la Biodiversidad	Male	Exp. 0673
Phyllostomidae	Glossophaga soricina	PE022	Peru	Piura	Faique	San Antonio	Female	Exp. 0002287
Phyllostomidae	Erophylla bombifrons	DR086	Dominican Republic	San Cristobal		Cuevas Pomier no. 4	Male	Exp. 0673
Phyllostomidae	Phyllonycteris poeyi	DR085	Dominican Republic	San Cristobal		Cuevas Pomier no. 4	Male	Exp. 0673
Phyllostomidae	Brachyphylla nana pumila	DR122	Dominican Republic	Monte Plata	Bayaguana	Cueva La Chepa	Male	Exp. 0673
Phyllostomidae	Lionycteris spurrelli	PE171	Peru	Loreto	Requena	Jenaro Herrera	Male	Exp. 0002287
Phyllostomidae	Carollia perspicillata	PE070	Peru	Loreto	Requena	Jenaro Herrera	Male	Exp. 0002287
Phyllostomidae	Carollia brevicauda	PE111	Peru	Loreto	Requena	Jenaro Herrera	Male	Exp. 0002287
Phyllostomidae	Rhinophylla pumilio	PE139	Peru	Loreto	Requena	Jenaro Herrera	Male	Exp. 0002287
Phyllostomidae	Rhinophylla fischerae	PE135	Peru	Loreto	Requena	Jenaro Herrera	Male	Exp. 0002287
Phyllostomidae	Sturnira tildae	PE105	Peru	Loreto	Requena	Jenaro Herrera	Male	Exp. 0002287
Phyllostomidae	Sturnira ludovici	PE019	Peru	Piura	Faique	San Antonio	Male	Exp. 0002287
Phyllostomidae	Uroderma bilobatum	PE175	Peru	Loreto	Requena	Jenaro Herrera	Male	Exp. 0002287
Phyllostomidae	Vampyrodes caraccioli	PE153	Peru	Loreto	Requena	Jenaro Herrera	Male	Exp. 0002287
Phyllostomidae	Mesophylla macconnelli	PE150	Peru	Loreto	Requena	Jenaro Herrera	Male	Exp. 0002287
Phyllostomidae	Chiroderma villosum	PE152	Peru	Loreto	Requena	Jenaro Herrera	Male	Exp. 0002287
Phyllostomidae	Phyllops falcatus	DR171	Dominican Republic	Monte Plata	Autopista Samaná Km 51	Parque Natural Salto de Socoa	Female	Exp. 0673
Phyllostomidae	Phyllops falcatus	DR003	Dominican Republic	Monte Plata	Autopista Samaná Km 51	Parque de la Biodiversidad	Female	Exp. 0673
Phyllostomidae	Artibeus fraterculus	PE005	Peru	Piura	Suyo	Roca Rajada	Male	Exp. 0002287
Phyllostomidae	Artibeus planirostris	PE069	Peru	Loreto	Requena	Jenaro Herrera	Male	Exp. 0002287
Phyllostomidae	Artibeus jamaicensis	DR001	Dominican Republic	Monte Plata	Autopista Samaná Km 51	Parque de la Biodiversidad	Female	Exp. 0673
Phyllostomidae	Artibeus jamaicensis	DR002	Dominican Republic	Monte Plata	Autopista Samaná Km 51	Parque de la Biodiversidad	Male	Exp. 0673
Phyllostomidae	Artibeus jamaicensis	DR004	Dominican Republic	Monte Plata	Autopista Samaná Km 51	Parque de la Biodiversidad	Female	Exp. 0673
Phyllostomidae	Artibeus jamaicensis	DR011	Dominican Republic	Monte Plata	Autopista Samaná Km 51	Parque de la Biodiversidad	Male	Exp. 0673
Phyllostomidae	Artibeus bogotensis	PE174	Peru	Loreto	Requena	Jenaro Herrera	Male	Exp. 0002287

## Sheet: Protein data
Family	Species names	Field Number	AMNH museum ID	Country of Origin	State	County	Precise Location	Sex	Permit	Total assays per species	Total retinas per sample	Collection date
Emballonuridae	Saccopteryx bilineata		278634	Belize	Orange Walk District		Lamanai Archaeological Reserve	Female	-	3	1	May 2013
Emballonuridae	Saccopteryx bilineata		278632	Belize	Orange Walk District		Lamanai Archaeological Reserve	Female		-	1	May 2013
Emballonuridae	Saccopteryx bilineata		278674	Belize	Orange Walk District		Lamanai Archaeological Reserve	Male		-	1	May 2013
Emballonuridae	Saccopteryx leptura		210509	Bolivia	Beni	Mamore	Mamore River, ca.12 degrees, 26 minutes latitude south	Male	-	3	1	Oct 1965
Emballonuridae	Saccopteryx leptura		210511	Bolivia	Beni	Mamore	Mamore River, ca.12 degrees, 26 minutes latitude south	Male		-	1	Oct 1965
Emballonuridae	Saccopteryx leptura		210508	Bolivia	Beni	Mamore	Mamore River, ca.12 degrees, 26 minutes latitude south	Female		-	1	Oct 1965
Molossidae	Molossus molossus	B-2016-024		Belize	Lamanai		High temple		WL/1/1/16 (26)	4	2	May 2016
Molossidae	Molossus molossus		247604	Uruguay	Rio Negro	Fray Bentos				-	1	Aug 1968
Molossidae	Molossus molossus		247606	Uruguay	Rio Negro	Fray Bentos				-	1	Aug 1968
Molossidae	Tadarida brasiliensis		236703	Haiti	Grand'Anse	Anse d' Hainault		Female	-	3	1	Jun 1975
Molossidae	Tadarida brasiliensis		236705	Haiti	Grand'Anse	Sapotille		Male		-	2	May 1975
Vespertilionidae	Eptesicus fuscus	IS1		USA	Illinois					3	1	unk 2015
Vespertilionidae	Eptesicus fuscus	IS2		USA	Illinois					-	2	unk 2015
Natalidae	Chilonatalus micropus		186979	Cuba	Isla de La Juventud		Cueva de Punta Brava	Male	-	3	1	Jan 1961
Natalidae	Chilonatalus micropus		186980	Cuba	Isla de La Juventud		Cueva de Punta Brava	Male		-	1	Jan 1961
Natalidae	Chilonatalus micropus		186981	Cuba	Isla de La Juventud		Cueva de Punta Brava	Male		-	1	Jan 1961
Noctilionidae	Noctilio leporinus		210668	Bolivia	Beni	Marban	ca. 15 kilometers south of Limoquije, Mamore River	Female	-	3	2	Jul 1965
Noctilionidae	Noctilio leporinus		173912	Panama	Colon	?	Chagres River	Female		-	1	Dec 1955
Mormoopidae	Pteronotus quadridens	2015-008	-	Puerto Rico		Arecibo	Cueva de Los Culebrones	Male	2014-IC-092	17	1	Feb 2015
Mormoopidae	Pteronotus quadridens	2015-009		Puerto Rico		Arecibo	Cueva de Los Culebrones	Female	2014-IC-092	-	1	Feb 2015
Mormoopidae	Pteronotus quadridens	2015-010		Puerto Rico		Arecibo	Cueva de Los Culebrones	Male	2014-IC-092	-	1	Feb 2015
Mormoopidae	Pteronotus quadridens	2016-103		Puerto Rico		Arecibo	Cueva de Los Culebrones	Female	2015-EPE-028	-	1	May 2016
Mormoopidae	Pteronotus quadridens	2016-104		Puerto Rico		Arecibo	Cueva de Los Culebrones	Female	2015-EPE-028	-	1	May 2016
Mormoopidae	Pteronotus quadridens	2016-105		Puerto Rico		Arecibo	Cueva de Los Culebrones	Female	2015-EPE-028	-	1	May 2016
Mormoopidae	Pteronotus quadridens	2016-106		Puerto Rico		Arecibo	Cueva de Los Culebrones	Female	2015-EPE-028	-	1	May 2016
Mormoopidae	Pteronotus quadridens	2016-107		Puerto Rico		Arecibo	Cueva de Los Culebrones	Female	2015-EPE-028	-	1	May 2016
Mormoopidae	Pteronotus quadridens	2016-108		Puerto Rico		Arecibo	Cueva de Los Culebrones	Female	2015-EPE-028	-	1	May 2016
Mormoopidae	Pteronotus quadridens	2016-109		Puerto Rico		Arecibo	Cueva de Los Culebrones	Female	2015-EPE-028	-	1	May 2016
Mormoopidae	Pteronotus quadridens	2016-110		Puerto Rico		Arecibo	Cueva de Los Culebrones	Female	2015-EPE-028	-	1	May 2016
Mormoopidae	Pteronotus quadridens	2016-111		Puerto Rico		Arecibo	Cueva de Los Culebrones	Female	2015-EPE-028	-	1	May 2016
Mormoopidae	Pteronotus quadridens	2016-112		Puerto Rico		Arecibo	Cueva de Los Culebrones	Female	2015-EPE-028	-	1	May 2016
Mormoopidae	Pteronotus quadridens	2016-113		Puerto Rico		Arecibo	Cueva de Los Culebrones	Female	2015-EPE-028	-	1	May 2016
Mormoopidae	Pteronotus quadridens	2016-119		Puerto Rico		Arecibo	Cueva de Los Culebrones	Female	2015-EPE-028	-	1	May 2016
Mormoopidae	Pteronotus quadridens	2016-120		Puerto Rico		Arecibo	Cueva de Los Culebrones	Female	2015-EPE-028	-	1	May 2016
Mormoopidae	Pteronotus quadridens	2016-121		Puerto Rico		Arecibo	Cueva de Los Culebrones	Female	2015-EPE-028	-	1	May 2016
Mormoopidae	Pteronotus davyi davyi	B-2016-013		Belize	Lamanai	Orange walk	Kakabiche	Female	WL/1/1/16 (26)	3	1	Apr 2016
Mormoopidae	Pteronotus davyi davyi	B-2016-015		Belize	Lamanai	Orange walk	Kakabiche	Female	WL/1/1/16 (26)	-	2	Apr 2016
Mormoopidae	Pteronotus parnellii (portoricensis)	2015-142		Puerto Rico		Arecibo	Cueva de Los Culebrones	Female	2014-IC-092	8	1	Feb 2015
Mormoopidae	Pteronotus parnellii (portoricensis)	2016-173		Puerto Rico		Aguadila	Cueva Cucharacha	Female	2015-EPE-028	-	1	May 2016
Mormoopidae	Pteronotus parnellii (portoricensis)	2016-174		Puerto Rico		Aguadila	Cueva Cucharacha	Female	2015-EPE-028	-	1	May 2016
Mormoopidae	Pteronotus parnellii (portoricensis)	2016-175		Puerto Rico		Aguadila	Cueva Cucharacha	Female	2015-EPE-028	-	1	May 2016
Mormoopidae	Pteronotus parnellii (portoricensis)	2016-168		Puerto Rico		Aguadila	Cueva Cucharacha	Female	2015-EPE-028	-	1	May 2016
Mormoopidae	Pteronotus parnellii (portoricensis)	2016-169		Puerto Rico		Aguadila	Cueva Cucharacha	Female	2015-EPE-028	-	1	May 2016
Mormoopidae	Pteronotus parnellii (portoricensis)	2016-016		Puerto Rico		Arecibo	Cueva de Los Culebrones	Male	2015-EPE-028	-	1	May 2016
Mormoopidae	Pteronotus parnellii (portoricensis)	2016-160		Puerto Rico		Arecibo	Cueva de Los Culebrones	Male	2015-EPE-028	-	1	May 2016
Mormoopidae	Mormoops blainvillei	2016-142		Puerto Rico		Arecibo	Cueva de Los Culebrones	Female	2015-EPE-028	6	1	May 2016
Mormoopidae	Mormoops blainvillei	2016-143		Puerto Rico		Arecibo	Cueva de Los Culebrones	Male	2015-EPE-028	-	1	May 2016
Mormoopidae	Mormoops blainvillei	2016-144		Puerto Rico		Arecibo	Cueva de Los Culebrones	Female	2015-EPE-028	-	1	May 2016
Mormoopidae	Mormoops blainvillei	2016-145		Puerto Rico		Arecibo	Cueva de Los Culebrones	Female	2015-EPE-028	-	1	May 2016
Mormoopidae	Mormoops blainvillei	2016-156		Puerto Rico		Arecibo	Cueva de Los Culebrones	Female	2015-EPE-028	-	1	May 2016
Mormoopidae	Mormoops blainvillei	2016-157		Puerto Rico		Arecibo	Cueva de Los Culebrones	Female	2015-EPE-028	-	1	May 2016
Phyllostomidae	Macrotus waterhousii	DR232		Dominican Republic	Monte Plata	Bayaguana	Cueva la Chepa	Female	Exp. 0673	3	1	Mar 2015
Phyllostomidae	Macrotus waterhousii	DR194		Dominican Republic	Monte Plata	Bayaguana	Cueva la Chepa	Female	Exp. 0673	-	1	Mar 2015
Phyllostomidae	Macrotus waterhousii	DR142		Dominican Republic	Monte Plata	Autopista Samaná Km 51	Parque Salto de Socoa	Female	Exp. 0673	-	1	Mar 2015
Phyllostomidae	Diaemus youngi		246230	Trinidad	Trinidad	Saint George County	Maracas Valley	Female	-	3	1	Oct 1967
Phyllostomidae	Diaemus youngi		246231	Trinidad	Trinidad	Saint George County	Maracas Valley	Male		-	1	Oct 1967
Phyllostomidae	Diaemus youngi	T-006		Trinidad	Trinidad	Monos island	Stone's farm	Female	598 & 599	-	1	Apr 2017
Phyllostomidae	Desmodus rotundus	2015-150	-	Belize	Lamanai	Orange walk		Male	CD/60/3/15(07)	6	1	Mar 2015
Phyllostomidae	Desmodus rotundus	2015-126		Belize	Lamanai	Orange walk		Male	CD/60/3/15(07)	-	1	Mar 2015
Phyllostomidae	Desmodus rotundus	2015-145		Belize	Lamanai	Orange walk		Male	CD/60/3/15(07)	-	1	Mar 2015
Phyllostomidae	Desmodus rotundus	2015-146		Belize	Lamanai	Orange walk		Male	CD/60/3/15(07)	-	1	Mar 2015
Phyllostomidae	Desmodus rotundus	B-2016-019		Belize	Lamanai	Orange walk		Male	WL/1/1/16 (26)	-	1	Apr 2016
Phyllostomidae	Desmodus rotundus	B-2016-011		Belize	Lamanai	Orange walk		Female	WL/1/1/16 (26)	-	1	Apr 2016
Phyllostomidae	Chrotopterus auritus	B-2017-25	-	Belize	Lamanai	Orange walk			WL/2/7/17 (21)	3	1	May 2017
Phyllostomidae	Chrotopterus auritus	B-2016-26		Belize	Lamanai	Orange walk			WL/1/1/16 (26)	-	2	Apr 2016
Phyllostomidae	Trachops cirrhosus	B-2016-006	-	Belize	Lamanai	Orange walk		Female	WL/1/1/16 (26)	3	2	Apr 2016
Phyllostomidae	Trachops cirrhosus	B-2017-029		Belize	Lamanai	Orange walk		Female	WL/2/7/17 (21)	-	1	May 2017
Phyllostomidae	Tonatia saurophila		266044	French Guiana	Cayenne	Sinnamary	Paracou		-	3	1	Jul 1991
Phyllostomidae	Tonatia saurophila		267099	French Guiana	Cayenne	Sinnamary	Paracou			-	1	Oct 1992
Phyllostomidae	Tonatia saurophila		266046	French Guiana	Cayenne	Sinnamary	Paracou			-	1	Jul 1991
Phyllostomidae	Phyllostomus hastatus		149223	Colombia	Norte de Santander	Cucuta	west of Cucuta, Zulia River	Male	-	4	1	Dec 1947
Phyllostomidae	Phyllostomus hastatus		173915	Panama	Colon	?	Chagres River	Male		-	1	Dec 1955
Phyllostomidae	Phyllostomus hastatus		173914	Panama	Colon	?	Chagres River	Male		-	1	Dec 1955
Phyllostomidae	Phyllostomus hastatus		267434	French Guiana	Cayenne	Sinnamary	Paracou	Male		-	1	Aug 1993
Phyllostomidae	Phyllostomus elongatus		209331	Bolivia	Beni	Mamore	ca. 15 kilometers northwest of Principe da Beira, opposite Puerto Acre; ca. 10 kilometers east of San Antonio	Male	-	3	2	Jul 1964
Phyllostomidae	Phyllostomus elongatus		210678			General Jose Ballivian		Male		-	1	Jul 1965
Phyllostomidae	Phyllostomus discolor	B-2016-023	-	Belize	Lamanai	Orange Walk District		Male	WL/1/1/16 (26)	3	2	Apr 2016
Phyllostomidae	Phyllostomus discolor	T-n		Trinidad		?		Female	598 & 599	-	1	Apr 2017
Phyllostomidae	Gardnerycteris crenulatum	2015-129	-	Belize	Lamanai	Orange Walk District			CD/60/3/15(07)	4	2	Mar 2015
Phyllostomidae	Gardnerycteris crenulatum	B-2016-002		Belize	Lamanai	Orange Walk District	High temple		WL/1/1/16 (26)	-	2	Apr 2016
Phyllostomidae	Anoura geoffroyi		246187	Trinidad	Trinidad	Saint Andrew County	Mount Tamana Caves	Female	-	3	1	Jan 1969
Phyllostomidae	Anoura geoffroyi		246185	Trinidad	Trinidad	Saint Andrew County	Mount Tamana Caves	Male		-	1	Feb 1969
Phyllostomidae	Anoura geoffroyi		246183	Trinidad	Trinidad	Saint Andrew County	Mount Tamana Caves	Male		-	1	Mar 1969
Phyllostomidae	Monophyllus redmani	2015-027		Puerto Rico		Arecibo	Cueva de Los Culebrones	Female		6	1	Feb 2015
Phyllostomidae	Monophyllus redmani	2016-024		Puerto Rico		Arecibo	Cueva de Los Culebrones	Female	2015-EPE-028	-	1	Feb 2016
Phyllostomidae	Monophyllus redmani	2016-020		Puerto Rico		Arecibo	Cueva de Los Culebrones	Female	2015-EPE-028	-	2	Feb 2016
Phyllostomidae	Monophyllus redmani	2016-035		Puerto Rico		Arecibo	Cueva de Los Culebrones	Female	2015-EPE-028	-	1	Feb 2016
Phyllostomidae	Monophyllus redmani	2016-019		Puerto Rico		Arecibo	Cueva de Los Culebrones	Female	2015-EPE-028	-	1	Feb 2016
Phyllostomidae	Glossophaga soricina	2015-153	-	Belize	Lamanai				CD/60/3/15(07)	4	1	Mar 2015
Phyllostomidae	Glossophaga soricina	2015-154		Belize	Lamanai				CD/60/3/15(07)	-	1	Mar 2015
Phyllostomidae	Glossophaga soricina	2015-118		Belize	Lamanai				CD/60/3/15(07)	-	2	Mar 2015
Phyllostomidae	Erophylla sezekorni	2016-006	-	Puerto Rico		Arecibo	Cueva de Los Culebrones		2015-EPE-028	6	1	Feb 2016
Phyllostomidae	Erophylla sezekorni	2016-025		Puerto Rico		Arecibo	Cueva de Los Culebrones		2015-EPE-028	-	1	Feb 2016
Phyllostomidae	Erophylla sezekorni	2016-007		Puerto Rico		Arecibo	Cueva de Los Culebrones		2015-EPE-028	-	2	Feb 2016
Phyllostomidae	Erophylla sezekorni	2016-027		Puerto Rico		Arecibo	Cueva de Los Culebrones		2015-EPE-028	-	1	Feb 2016
Phyllostomidae	Erophylla sezekorni	2016-024		Puerto Rico		Arecibo	Cueva de Los Culebrones		2015-EPE-028	-	1	Feb 2016
Phyllostomidae	Erophylla bombifrons	2017-018	-	Puerto Rico		Arecibo	Cueva de Los Culebrones		2016-IC-189	5	2	Feb 2017
Phyllostomidae	Erophylla bombifrons	2017-019		Puerto Rico		Arecibo	Cueva de Los Culebrones		2016-IC-189	-	1	Feb 2017
Phyllostomidae	Erophylla bombifrons	DR265		Dominican Republic	Sanchez Ramirez	Platanal, Matias	Cueva Honda de Julian		Exp. 0673	-	1	Mar 2015
Phyllostomidae	Erophylla bombifrons	DR267		Dominican Republic	Sanchez Ramirez	Platanal, Matias	Cueva Honda de Julian		Exp. 0673	-	1	Mar 2015
Phyllostomidae	Phyllonycteris poeyi		23762	Cuba	La Habana	Guanajay	?	Unknown	-	5	1	Apr 1900(?)
Phyllostomidae	Phyllonycteris poeyi		186987	Cuba	Sancti Spiritus	Yaguajay	Punta Caguanes, Cueva de Colon	Male		-	1	Feb 1958
Phyllostomidae	Phyllonycteris poeyi		186988	Cuba	Sancti Spiritus	Yaguajay	Punta Caguanes, Cueva de Colon	Female		-	1	Feb 1958
Phyllostomidae	Phyllonycteris poeyi	DR176		Dominican Republic	Sanchez Ramirez	Platanal, Matias	Cueva Honda de Julian	Female	Exp. 0673	-	2	Mar 2015
Phyllostomidae	Brachyphylla nana pumila	DR231		Dominican Republic	Monte Plata	Bayaguana	Cueva la Chepa	Female	Exp. 0673	3	2	Mar 2015
Phyllostomidae	Brachyphylla nana pumila	DR233		Dominican Republic	Monte Plata	Bayaguana	Cueva la Chepa	Female	Exp. 0673	-	1	Mar 2015
Phyllostomidae	Lonchophylla robusta		143763	Panama	Panama	Panama	Chilibrillo caves	Unknown	-	3	2	Jan 1941
Phyllostomidae	Lonchophylla robusta		143762	Panama	Panama	Panama	Chilibrillo caves	Unkown		-	1	Jan 1941
Phyllostomidae	Carollia perspicillata		68868	Ecuador	Chimborazo	Chunchi	Puente de Chimbo	Unknown	-	4	1	Sep 1922
Phyllostomidae	Carollia perspicillata		68876	Ecuador	Chimborazo	Chunchi	Puente de Chimbo	Unknown		-	1	Sep 1922
Phyllostomidae	Carollia perspicillata		68870	Ecuador	Chimborazo	Chunchi	Puente de Chimbo			-	1	Sep 1922
Phyllostomidae	Carollia perspicillata	2015-132		Belize	Lamanai	Orange Walk		Female	CD/60/3/15(07)	-	1	Mar 2015
Phyllostomidae	Carollia brevicauda		249775	Peru	Cusco		Cordillera Vilcabamba	Female	-	3	1	Jul 1972
Phyllostomidae	Carollia brevicauda		249774	Peru	Cusco		Cordillera Vilcabamba	Male		-	1	Jul 1972
Phyllostomidae	Carollia brevicauda		214146	Peru	Huanuco	Pachitea				-	1	Jul 1972
Phyllostomidae	Carollia sowelli	2015-113	-	Belize	Lamanai	Orange walk			CD/60/3/15(07)	4	1	Mar 2015
Phyllostomidae	Carollia sowelli	2015-120		Belize	Lamanai	Orange walk			CD/60/3/15(07)	-	1	Mar 2015
Phyllostomidae	Carollia sowelli	2015-131		Belize	Lamanai	Orange walk			CD/60/3/15(07)	-	2	Mar 2015
Phyllostomidae	Rhinophylla pumilio		262421	Bolivia	Pando	Manuripi	Agua Dulce	Female	-	3	1	Jul 1986
Phyllostomidae	Rhinophylla pumilio		262423	Bolivia	Pando	Manuripi	Agua Dulce	Female		-	1	Jul 1986
Phyllostomidae	Rhinophylla pumilio		262422	Bolivia	Pando	Manuripi	Agua Dulce	Male		-	1	Jul 1986
Phyllostomidae	Rhinophylla fischerae		233519	Peru	Huanuco		Llullapichis River, tributary of Pachitea River	Male	-	3	1	Aug 1969
Phyllostomidae	Rhinophylla fischerae		233864	Peru	Huanuco		Llullapichis River, tributary of Pachitea River	Female		-	1	Jun 1970
Phyllostomidae	Rhinophylla fischerae		233863	Peru	Huanuco		Llullapichis River, tributary of Pachitea River	Female		-	1	Jun 1970
Phyllostomidae	Sturnira lilium	2015-123		Belize	Lamanai	Orange walk		Female	CD/60/3/15(07)	4	1	Mar 2015
Phyllostomidae	Sturnira lilium	2015-127		Belize	Lamanai	Orange walk		Female	CD/60/3/15(07)	-	1	Mar 2015
Phyllostomidae	Sturnira lilium	2016-001		Belize	Lamanai	Orange walk	High temple	Female	WL/1/1/16 (26)	-	1	Apr 2016
Phyllostomidae	Sturnira lilium	2016-021		Belize	Lamanai	Orange walk	Sugar Mill	Female	WL/1/1/16 (26)	-	1	Apr 2016
Phyllostomidae	Sturnira tildae		237959	Brazil	Roraima		Uraricoera River, Uaica	Female	-	3	1	Mar 1977
Phyllostomidae	Sturnira tildae		237958	Brazil	Roraima		Uraricoera River, Uaica	Female		-	1	Mar 1977
Phyllostomidae	Sturnira tildae		237960	Brazil	Roraima		Uraricoera River, Uaica	Male		-	1	Mar 1977
Phyllostomidae	Sturnira ludovici		249094	Mexico	Jalisco	Talpa de Allende	12.5 miles southwest by road of Talpa de Allende	Female	-	3	2	Jun 1979
Phyllostomidae	Sturnira ludovici		249093	Mexico	Jalisco	Talpa de Allende	12.5 miles southwest by road of Talpa de Allende	Male		-	1	Jun 1979
Phyllostomidae	Uroderma bilobatum		209489	Bolivia	Beni	Vaca Diez	Guayaramerin	Male	-	3	1	May1964
Phyllostomidae	Uroderma bilobatum		209492	Bolivia	Beni	Vaca Diez	Guayaramerin	Male		-	1	May1964
Phyllostomidae	Uroderma bilobatum	2016-018		Belize	Lamanai	Orange Walk District	Rice Trail	Female	WL/1/1/16 (26)	-	1	Apr 2016
Phyllostomidae	Vampyrodes caraccioli		209518	Bolivia	Beni	?	Curiche River mouth	Female	-	4	2	Jul 1964
Phyllostomidae	Vampyrodes caraccioli		239254	Panama	Colon	Colon	Barro Colorado Island	Female		-	2	Jun 1974
Phyllostomidae	Platyrrhinus helleri		246222	Trinidad	Trinidad	Saint George County	4 miles by road north of Arima	Female	-	3	1	May 1967
Phyllostomidae	Platyrrhinus helleri		246223	Trinidad	Trinidad	Saint George County	4 miles by road north of Arima	Male		-	1	Nov 1967
Phyllostomidae	Platyrrhinus helleri		233642	Peru	Jumin	Tamara	near R/ Chi JW Terborgh			-	1	Aug 1970
Phyllostomidae	Platyrrhinus dorsalis		236104	Peru	Huanuco		Cerros del Sira	Male	-	3	1	Jul 1971
Phyllostomidae	Platyrrhinus dorsalis		236105	Peru	Huanuco		Cerros del Sira	Male		-	1	Jul 1971
Phyllostomidae	Platyrrhinus dorsalis		236107	Peru	Huanuco		Cerros del Sira	Female		-	1	Jul 1971
Phyllostomidae	Platyrrhinus aurarius		265341	Venezuela	Bolivar	Raul Leoni	Mount Guaiquinima, Camp #1, northcentral area of plateau	Male	-	3	1	Feb 1990
Phyllostomidae	Platyrrhinus aurarius		265340	Venezuela	Bolivar	Raul Leoni	Mount Guaiquinima, Camp #1, northcentral area of plateau	Male		-	1	Feb 1990
Phyllostomidae	Platyrrhinus aurarius		265342	Venezuela	Bolivar	Raul Leoni	Mount Guaiquinima, Camp #1, northcentral area of plateau	Female		-	1	Feb 1990
Phyllostomidae	Mesophylla macconnelli		233746	Peru	Huanuco		Cerros del Sira	Female	-	3	2	Aug 1969
Phyllostomidae	Mesophylla macconnelli		233748	Peru	Huanuco		Cerros del Sira	Male		-	1	Aug 1969
Phyllostomidae	Chiroderma villosum		209528	Bolivia	Beni	Mamore	Baures River mouth	Female	-	3	1	Oct 1964
Phyllostomidae	Chiroderma villosum		209542	Bolivia	Beni	Mamore	opposite Costa Marques, Brazil, Itenez River	Male		-	1	Oct 1964
Phyllostomidae	Chiroderma villosum		209554	Bolivia	Beni	Mamore	opposite Costa Marques, Brazil, Itenez River	Female		-	1	Oct 1964
Phyllostomidae	Vampyriscus bidens		233736	Peru	Huanuco		Cerros del Sira	Male	-	3	1	Jul 1969
Phyllostomidae	Vampyriscus bidens		233785	Peru	Huanuco		Cerros del Sira	Male		-	1	Jul 1969
Phyllostomidae	Vampyriscus bidens		233737	Peru	Huanuco		Cerros del Sira	Male		-	1	Jul 1969
Phyllostomidae	Enchisthenes hartii		268088	Peru	Cajamarca	Cutervo	4 kilometers west of Chaupe	Female	-	3	2	Jun 1995
Phyllostomidae	Enchisthenes hartii		268089	Peru	Cajamarca	Cutervo	5 kilometers west of Chaupe	Male		-	1	Jun 1995
Phyllostomidae	Phyllops falcatus	DR181	-	Dominican Republic	Monte Plata	Autopista Samaná Km 62	Parque Natural Salto de Socoa	Female	Exp. 0673	4	1	Mar 2015
Phyllostomidae	Phyllops falcatus	DR135		Dominican Republic	Pedernales	Oviedo	Parque Nacional Jaragua	Male	Exp. 0673	-	2	Mar 2015
Phyllostomidae	Phyllops falcatus	DR159		Dominican Republic	Monte Plata	Autopista Samaná Km 62	Parque Natural Salto de Socoa	Female	Exp. 0673	-	1	Mar 2015
Phyllostomidae	Sphaeronycteris toxophyllum		209739	Bolivia	Beni	Mamore	Baures River mouth	Male	-	3	1	Oct 1964
Phyllostomidae	Sphaeronycteris toxophyllum		235561	Venezuela	Aragua	Mario Briceno Iragorry	5 kilometers east southeast of Turiamo	Male		-	1	Aug 1971
Phyllostomidae	Sphaeronycteris toxophyllum		265354	Venezuela	Bolivar	Raul Leoni	Mount Guaiquinima, Carapo River, Camp #7	Female		-	1	Feb 1990
Phyllostomidae	Centurio senex		179990	Trinidad	Trinidad	Saint George County	Port of Spain, Memorial Park	Male	-	4	2	Nov 1958
Phyllostomidae	Centurio senex		179991					Male		-	2	Nov 1958
Phyllostomidae	Artibeus fraterculus		61466	Ecuador	El Oro	Santa Rosa		Male	-	3	1	Nov 1921
Phyllostomidae	Artibeus fraterculus		61470	Ecuador	El Oro	Santa Rosa		Female		-	1	Nov 1921
Phyllostomidae	Artibeus fraterculus		61476	Ecuador	El Oro	Santa Rosa		Female		-	1	Nov 1921
Phyllostomidae	Artibeus lituratus	2015-130	-	Belize	Lamanai	Orange walk			CD/60/3/15(07)	3	1	Mar 2015
Phyllostomidae	Artibeus lituratus	2015-136		Belize	Lamanai	Orange walk			CD/60/3/15(07)	-	1	Mar 2015
Phyllostomidae	Artibeus lituratus	B-2016-004		Belize	Lamanai	Orange walk	High temple		WL/1/1/16 (26)	-	1	Apr 2016
Phyllostomidae	Artibeus planirostris		144392	Venezuela	Aragua	Mario Briceno Iragorry	Turiamo	Unknown	-	3	2	Sep 1945
Phyllostomidae	Artibeus planirostris		265591	Venezuela	Bolivar	Gran Sabana	La Escalera, Kilometer 122 on El Dorado to Santa Elena Road	Male		-	1	Jul 1990
Phyllostomidae	Artibeus jamaicensis	2015-071		Puerto Rico		Arecibo	Cueva de Los Culebrones		2014-IC-091	8	1	Feb 2015
Phyllostomidae	Artibeus jamaicensis	2015-094		Puerto Rico		Arecibo	Cueva de Los Culebrones		2014-IC-092	-	1	Feb 2015
Phyllostomidae	Artibeus jamaicensis	2016-061		Puerto Rico		Arecibo	Cueva de Los Culebrones		2015-EPE-028	-	1	May 2016
Phyllostomidae	Artibeus jamaicensis	2015-135		Belize		Orange walk			CD/60/3/15(07)	-	1	Mar 2015
Phyllostomidae	Artibeus jamaicensis	2016-040		Puerto Rico		Arecibo	Cueva de Los Culebrones		2015-EPE-028	-	1	May 2016
Phyllostomidae	Artibeus jamaicensis	2016-033		Puerto Rico		Arecibo	Cueva de Los Culebrones		2015-EPE-028	-	1	Feb 2016
Phyllostomidae	Artibeus jamaicensis	2016-161		Puerto Rico		Arecibo	Cueva de Los Culebrones		2015-EPE-028	-	1	May 2016
Phyllostomidae	Artibeus jamaicensis	2016-167		Puerto Rico		Arecibo	Cueva de Los Culebrones		2015-EPE-028	-	1	May 2016
Phyllostomidae	Artibeus concolor		267488	French Guiana	Cayenne	Sinnamary	Paracou	Female	-	3	2	Aug 1993
Phyllostomidae	Artibeus concolor		80340	Brazil	Amazonas	Manaus				-	1	Sep 1929
Phyllostomidae	Artibeus phaeotis	B-2016-007		Belize					-	3	2	Apr 2016
Phyllostomidae	Artibeus phaeotis	B-2016-010		Belize						-	1	Apr 2016
Phyllostomidae	Artibeus cinereus		236066	Peru	Huanuco		Cerros del Sira	Female	-	3	1	Jul 1971
Phyllostomidae	Artibeus cinereus		236064	Peru	Huanuco		Cerros del Sira	Male		-	2	Jul 1971
