# Supplementary figures and images for: Multifactorial processes underlie parallel opsin loss in neotropical bats
Source: eLife journal article supplement (doi:10.7554/elife.37412), 2018-12-17

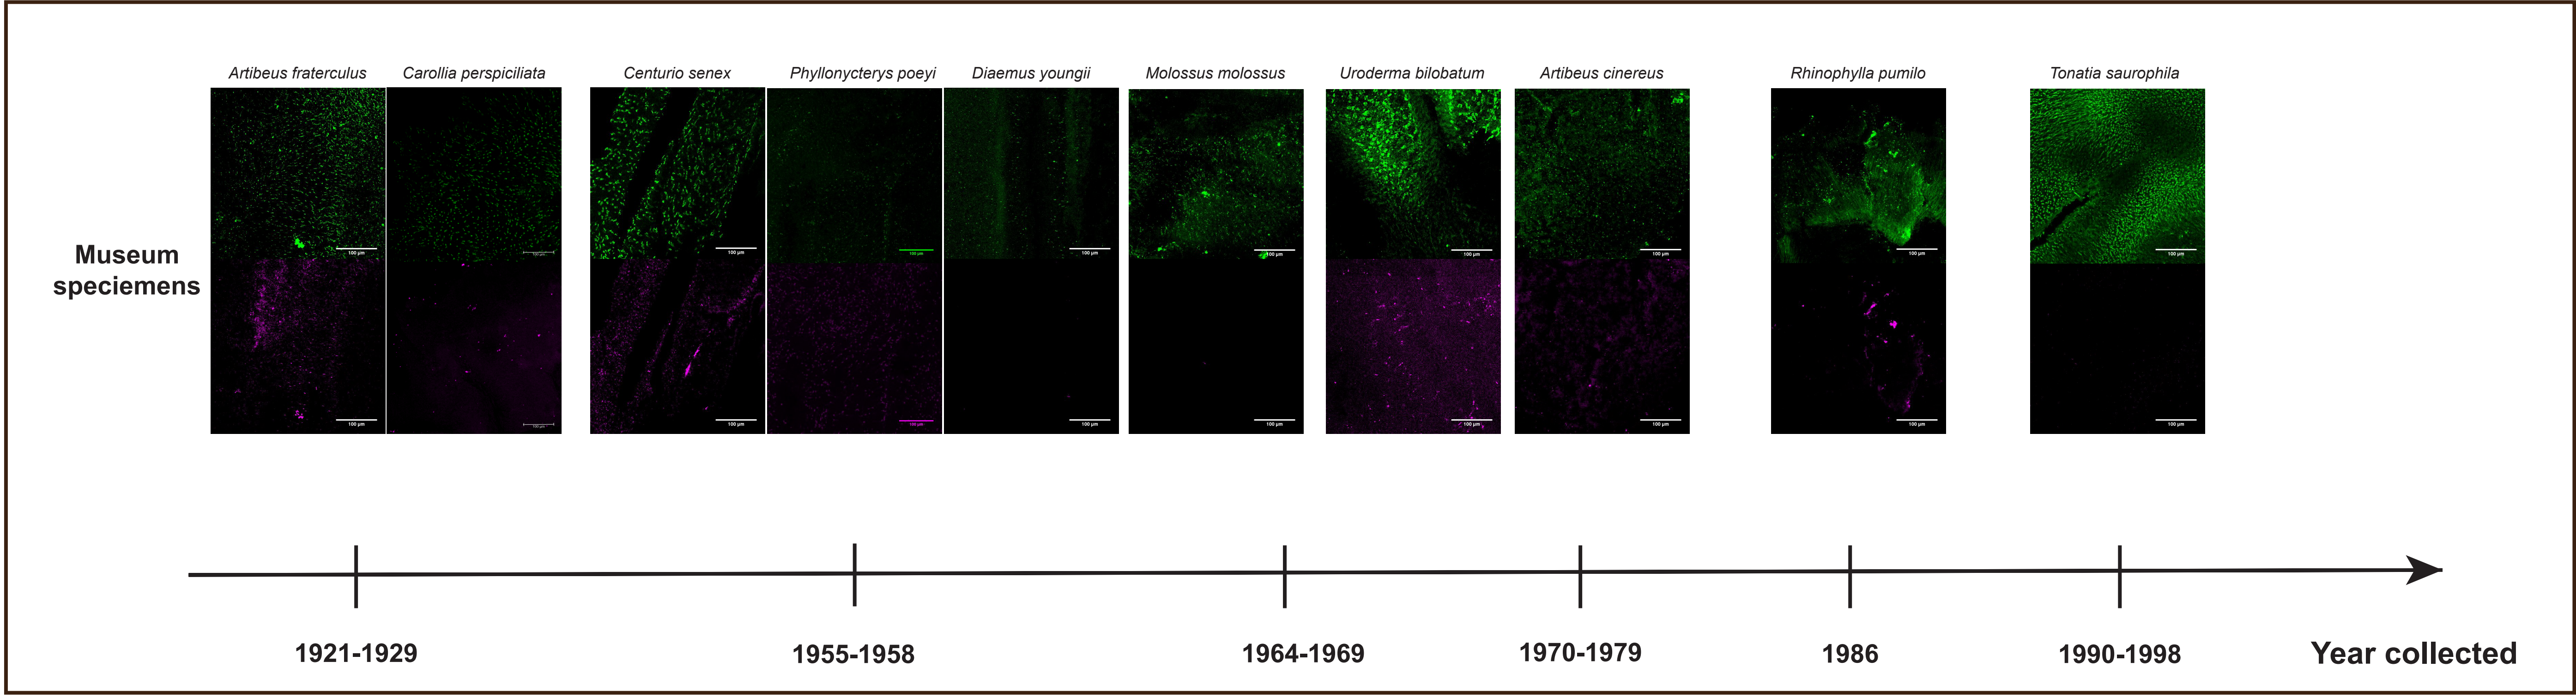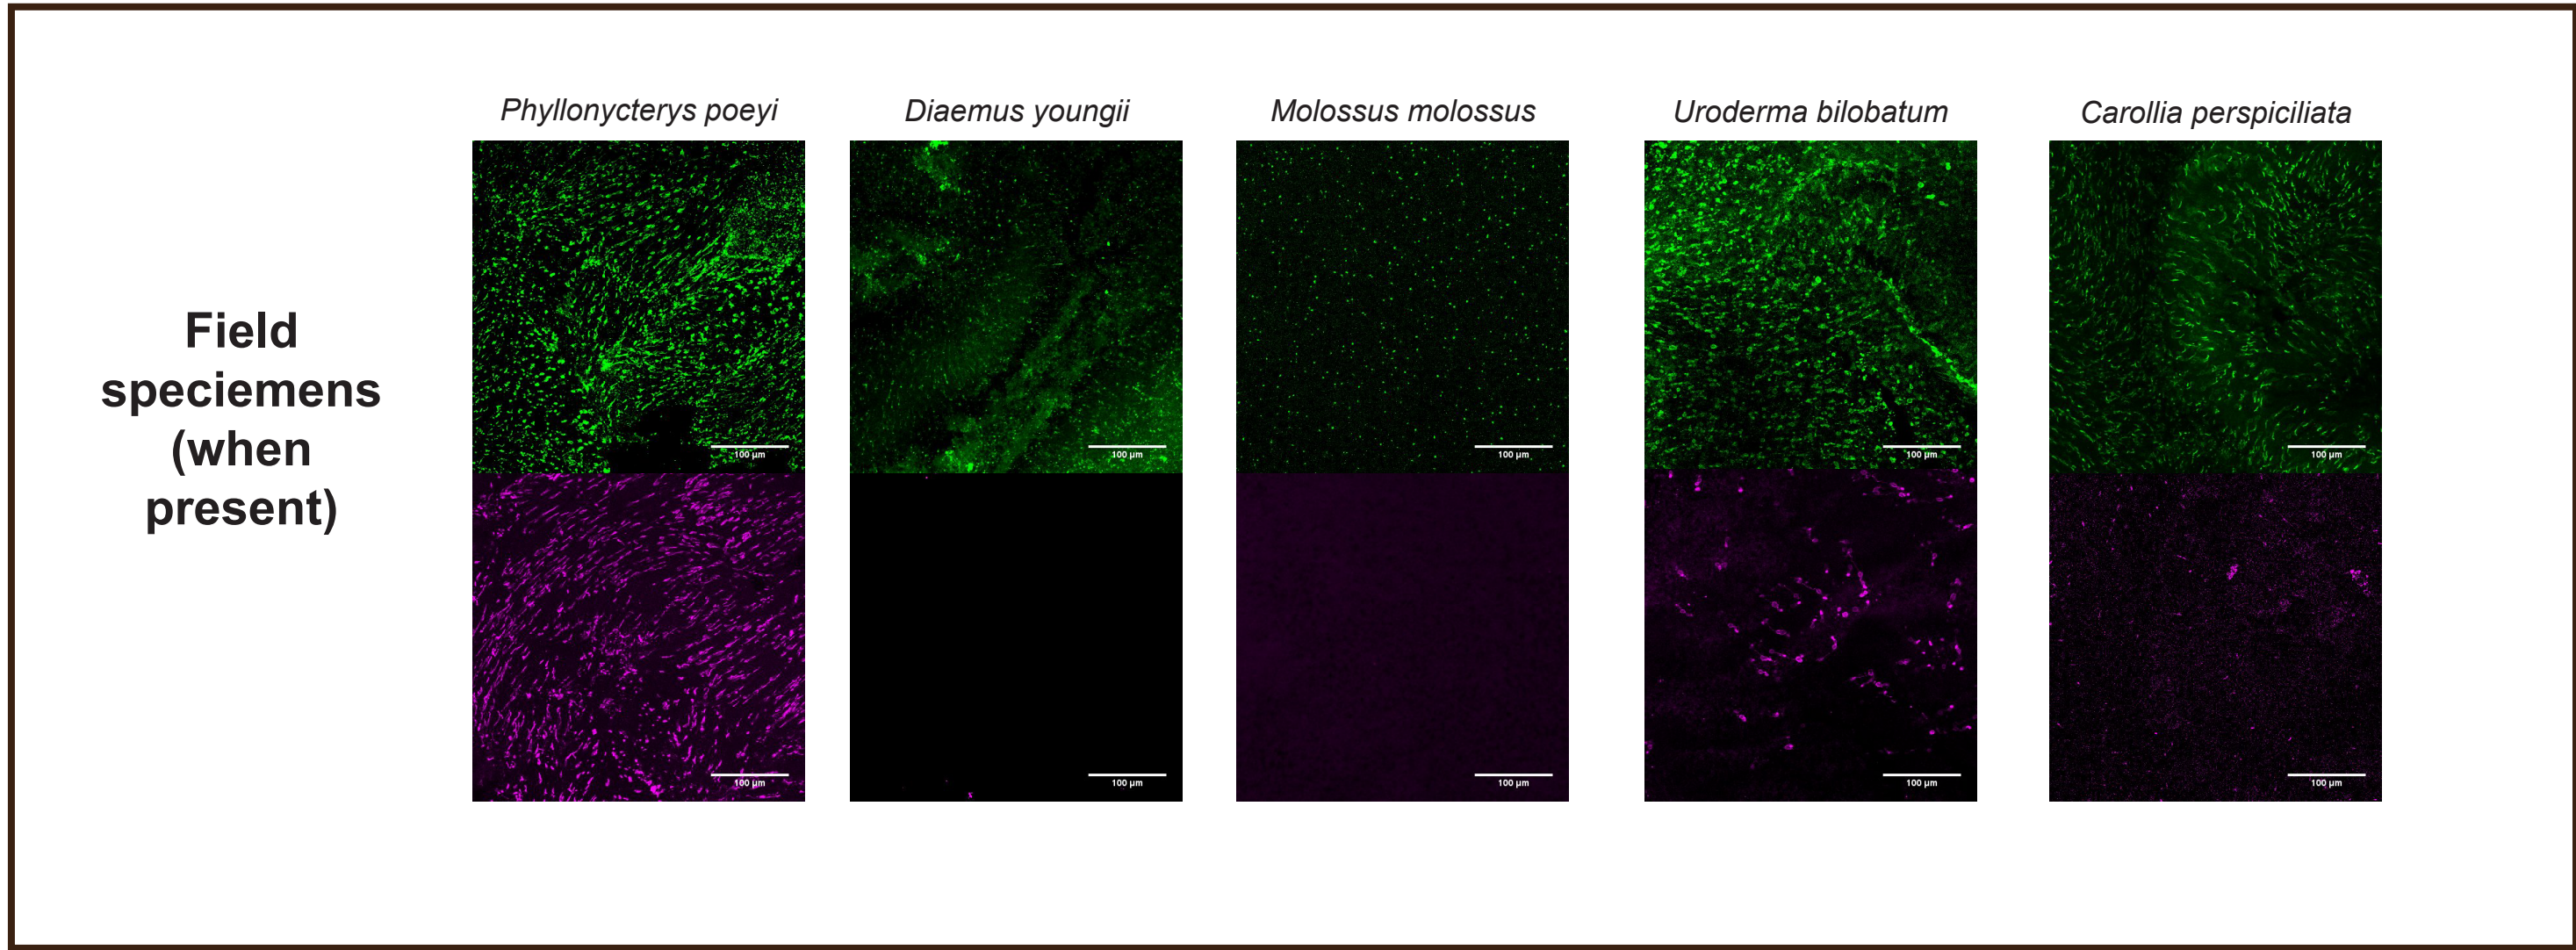

Supplement: supp [file elife_poa_e37412_Figure_1_figure_supplement_4.pdf › elife_poa_e37412_Figure_1_figure_supplement_4.pdf]

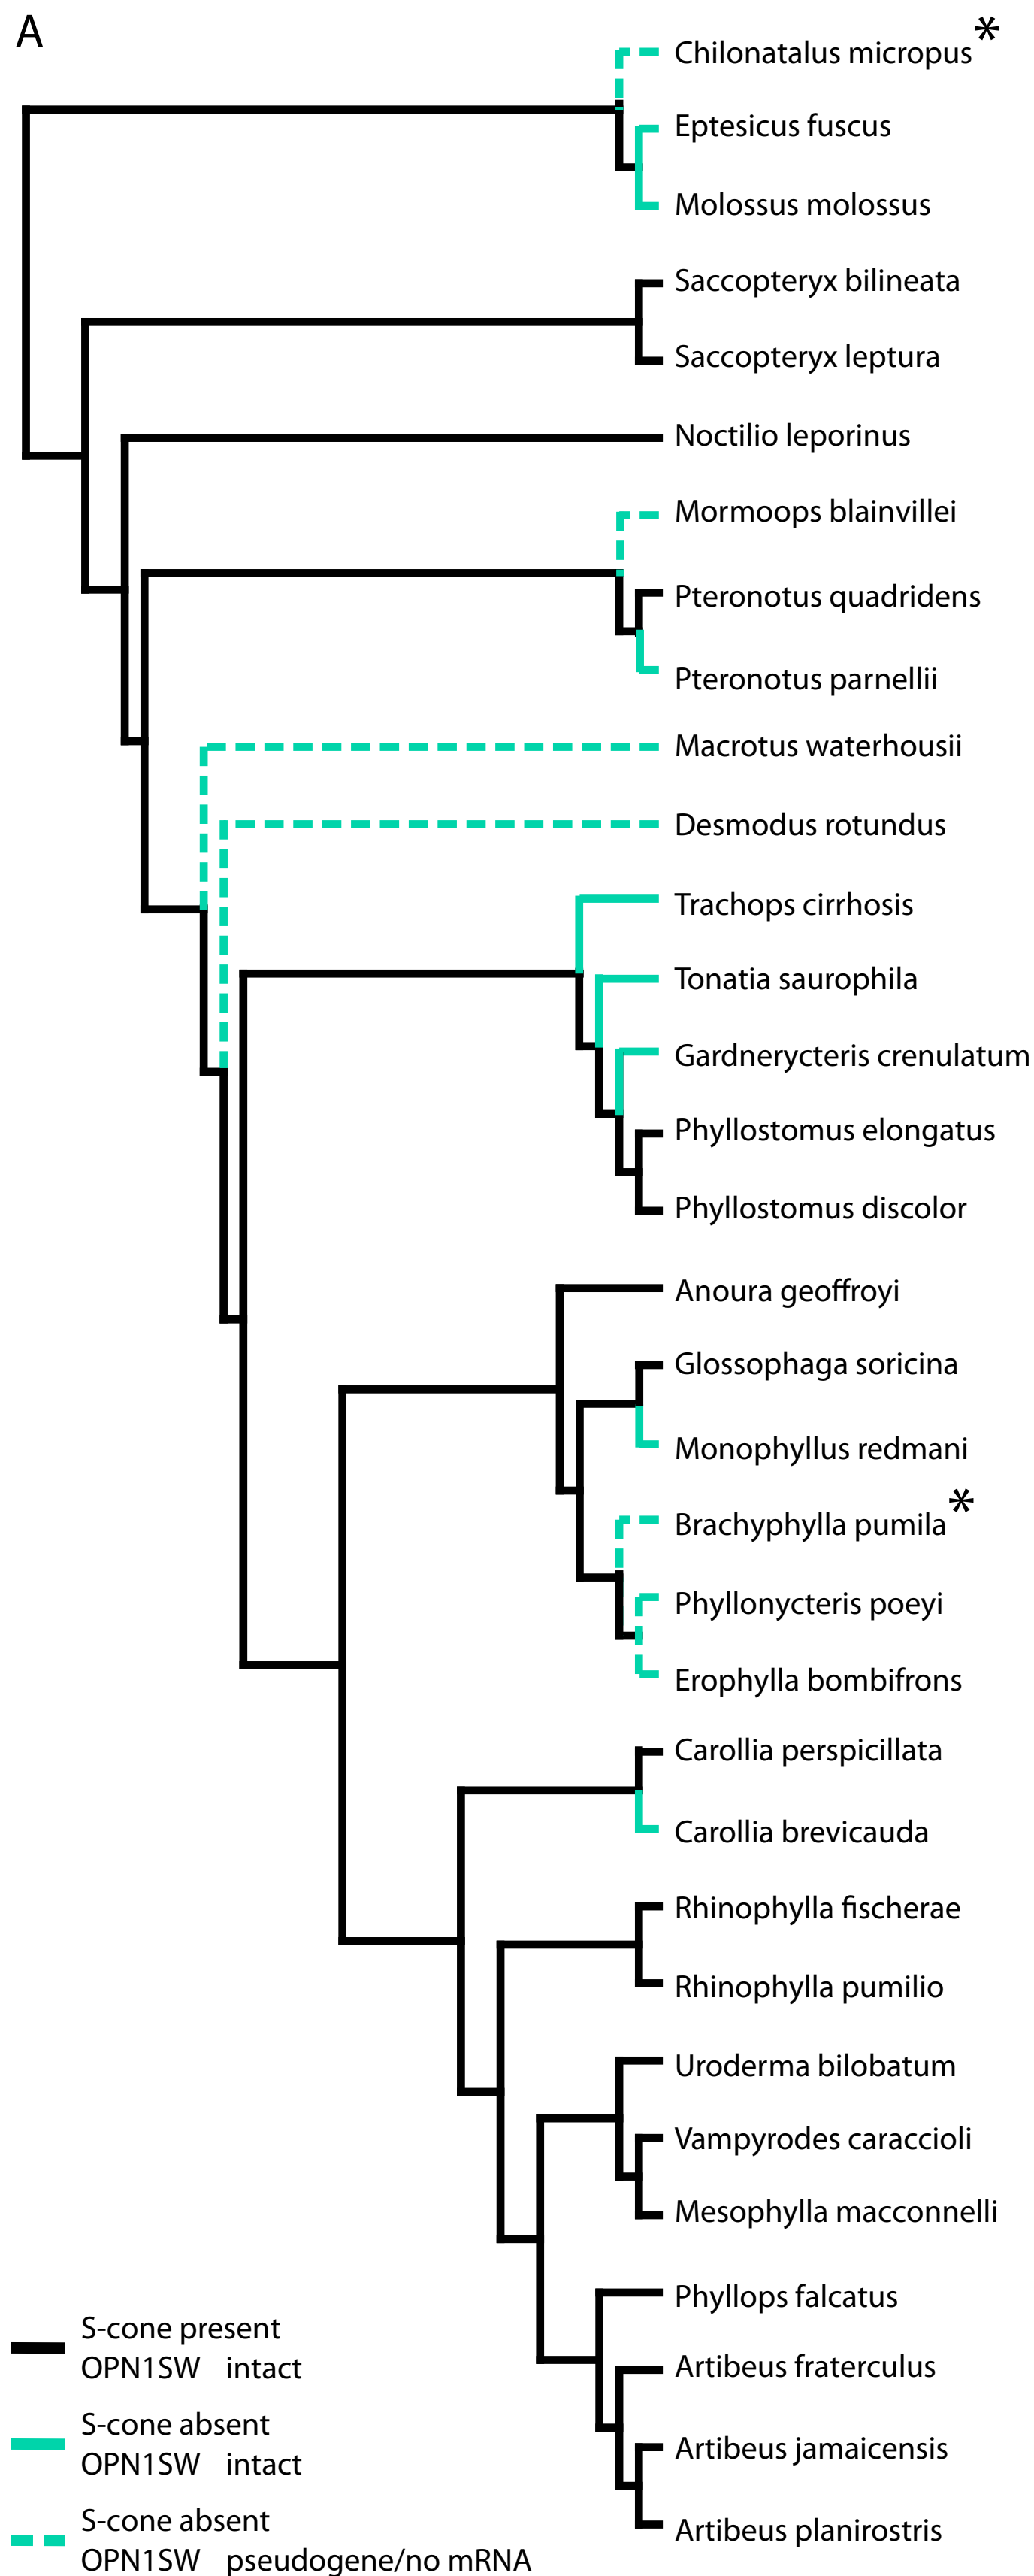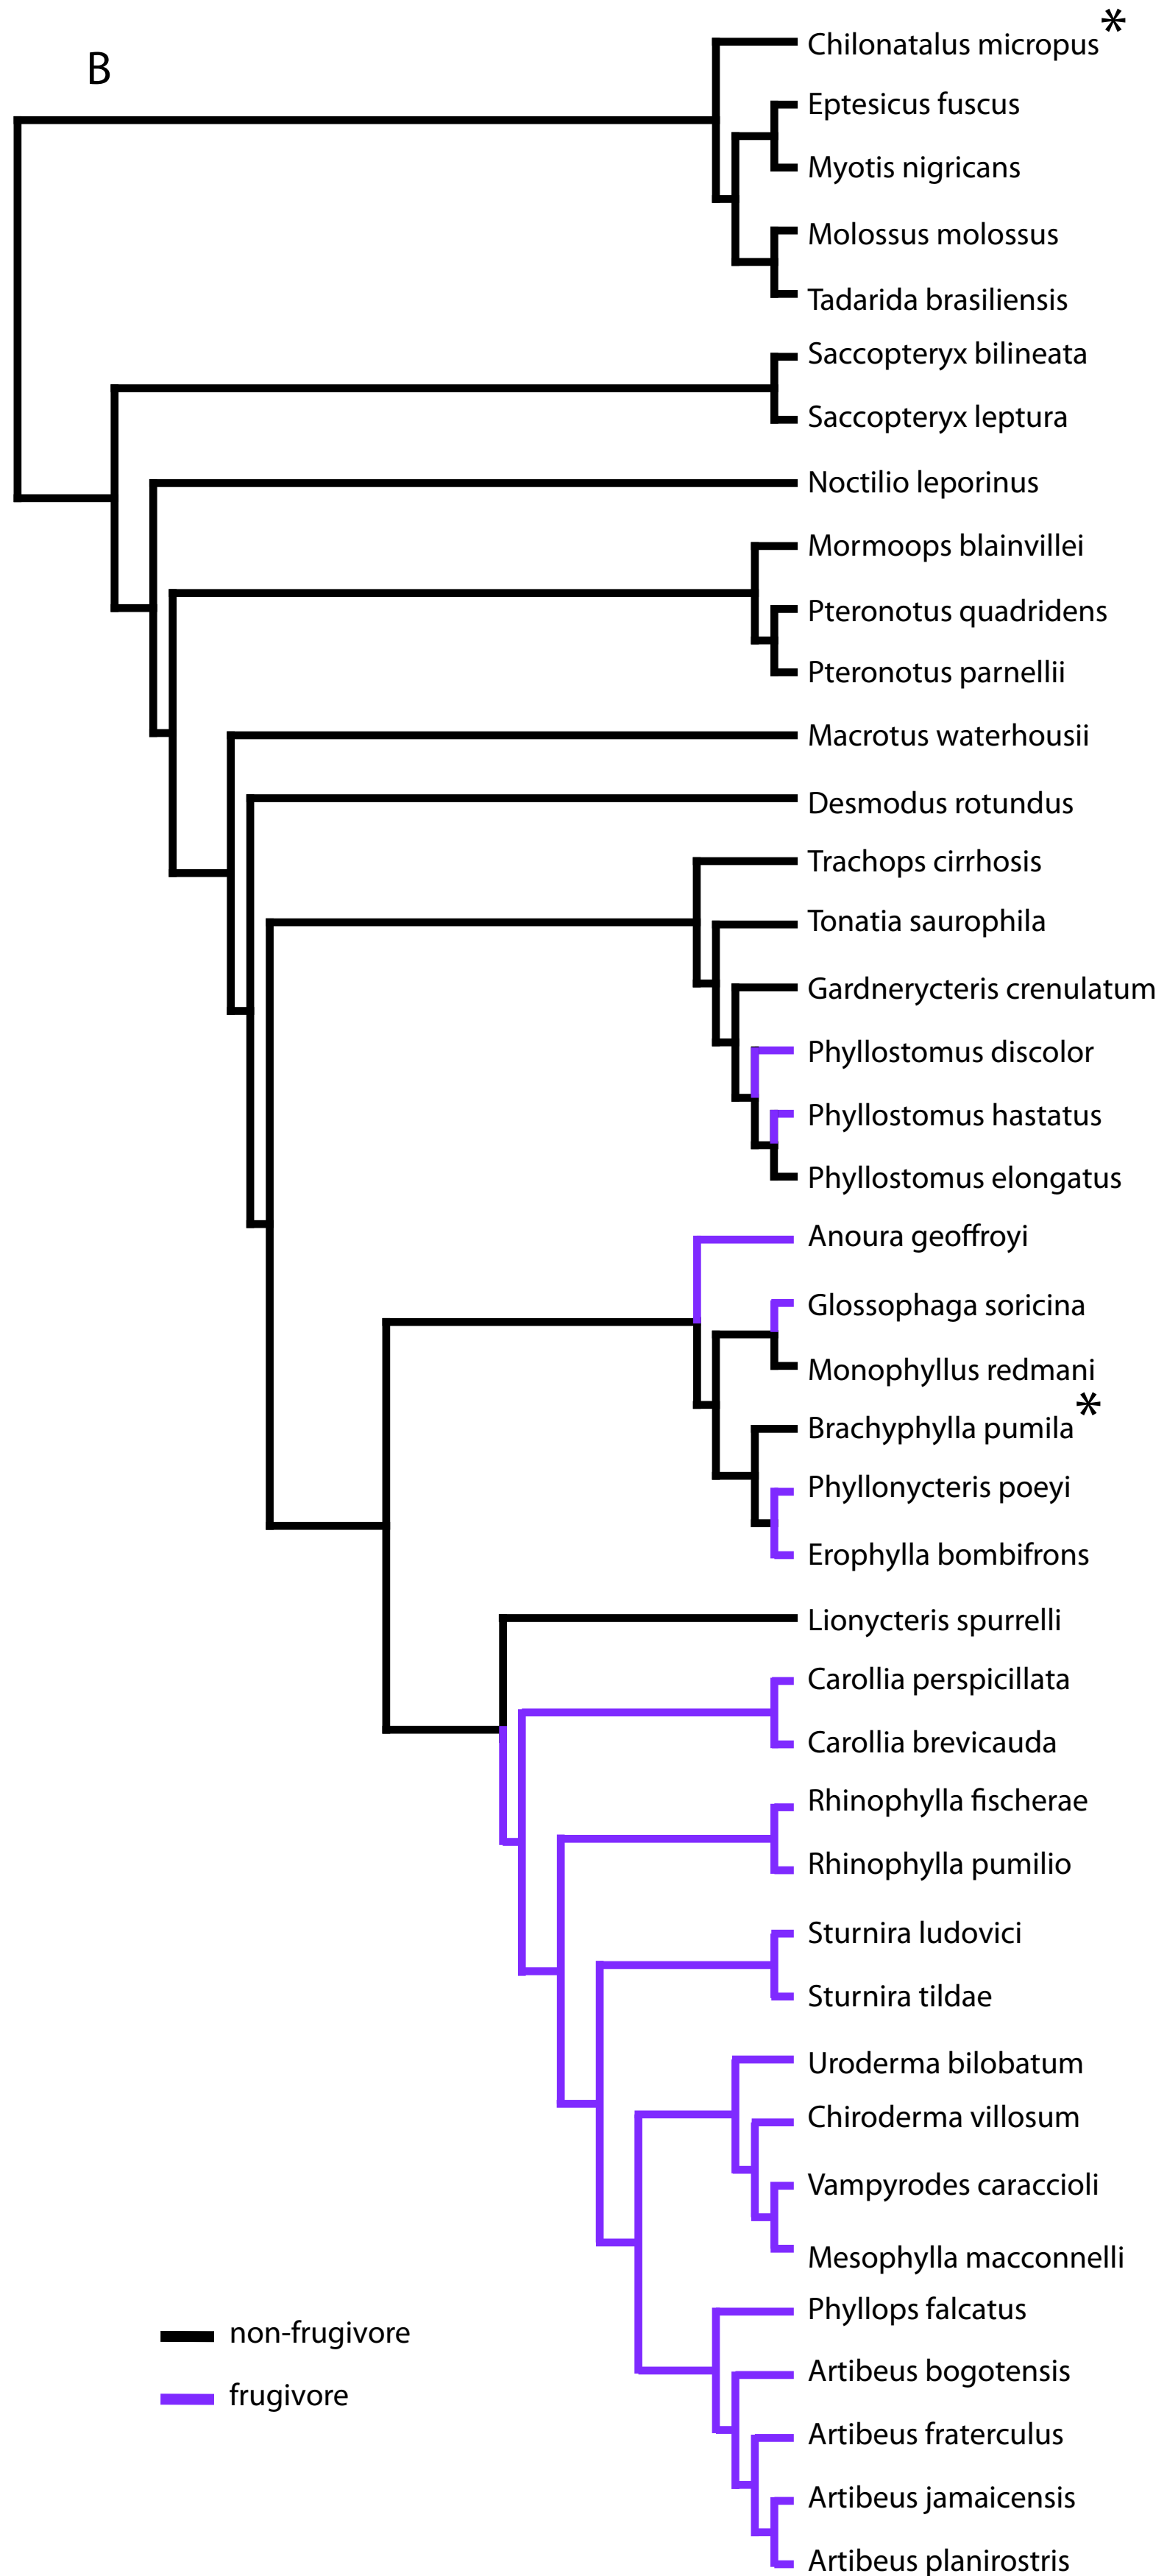

Supplement: supp [file elife_poa_e37412_Figure_5_figure_supplement_1.pdf › elife_poa_e37412_Figure_5_figure_supplement_1.pdf]
